# Supplementary material for: The Role of Tourism and Recreation in the Spread of Non-Native Species: A Systematic Review and Meta-Analysis
Source: PLoS One. 2015 Oct 20;10(10):e0140833. doi: 10.1371/journal.pone.0140833 (PMC4618285; doi:10.1371/journal.pone.0140833)
Supplement: S2 Table — (XLSX) [file pone.0140833.s005.xlsx]

## Sheet: Sheet1
ID	Author(s)	Title	Journal	Year	Abstract	Reason for excluding
383	Airoldi L., Bulleri F.	Anthropogenic disturbance can determine the magnitude of opportunistic species responses on marine urban infrastructures	PLoS ONE	2011	Background: Coastal landscapes are being transformed as a consequence of the increasing demand for infrastructures to sustain residential, commercial and tourist activities. Thus, intertidal and shallow marine habitats are largely being replaced by a variety of artificial substrata (e.g. breakwaters, seawalls, jetties). Understanding the ecological functioning of these artificial habitats is key …	"Human activities" too vague. Unclear whether tourist related or local population.
2367	Aldridge, DC; Elliott, P; Moggridge, GD	The recent and rapid spread of the zebra mussel (Dreissena polymorpha) in Great Britain	BIOLOGICAL CONSERVATION	2004	This paper reviews the current, apparently rapid spread of zebra mussels (Dreissena polymorpha) in Britain, discusses the possible causes of this spread, considers the potential ecological consequences, and looks at what measures could be undertaken to minimise the impacts of zebra mussels and other invasive pests in Britain's freshwaters. Five out of 27 major water companies reported increases i…	No specific data on level of tourism/recreation/visitor numbers provided
638	Alongi G., Cormaci M., Furnari G., Catra M.	Floristic macroalgal diversity in selected submarine caves located within two marine protected areas off Lampedusa Island and Sicily (Italy)	Botanica Marina	2012	We investigated phytobenthos in submerged marine caves. Underwater caves have rarely been examined for floristic composition. The study was carried out in two Mediterranean marine protected areas (MPAs) [Plemmirio (Maddalena Peninsula, Syracuse, Ionian Sea) and Pelagean Islands (Straits of Sicily)] and the caves were chosen on the basis of their geomorphology, exposure, and bathymetry. From our c…	Can’t access full text
2423	Amaral, ACZ; Jablonski, S	Conservation of marine and coastal biodiversity in Brazil	CONSERVATION BIOLOGY	2005	The invertebrate benthos, especially the micro- and mesofaunal components, of the Brazilian seas is still poorly known. Relatively few species have been recorded, reflecting the lack of research in this field. The intertidal zone, to depths of about 20 in, has been studied the most, and there the numbers of endemic species are relatively high. The diversity of demersal and pelagic fishes is simil…	No quantitative data supplied
2812	Amat, Maria E.; Vargas, Pablo; Gomez, Jose M.	Effects of human activity on the distribution and abundance of an endangered Mediterranean high-mountain plant (Erysimum penyalarense)	JOURNAL FOR NATURE CONSERVATION	2013	The Iberian mountains are important biodiversity hotspots that face great immediate threats like other species-rich regions on Earth. Preservation of natural communities has historically been based on protecting them from physical disturbance. One of the most important causes of disturbance in natural communities today is human activity. Erysimum penyalarense is an endemic and endangered Mediterr…	Native species only
2	Ansong M., Pickering C.	Weed seeds on clothing: A global review	Journal of Environmental Management	2014	Weeds are a major threat to biodiversity including in areas of high conservation value. Unfortunately, people may be unintentionally introducing and dispersing weed seeds on their clothing when they visit these areas. To inform the management of these areas, we conducted a systematic quantitative literature review to determine the diversity and characteristics of species with seeds that can attac…	Experimental design doesn't allow calculation of effect size
313	Ansong M., Pickering C.	A global review of weeds that can germinate from horse dung	Journal of Environmental Management	2013	To assess the diversity of weed seeds dispersed via horse dung, we reviewed 15 studies on seed germination from horse dung - six from Europe, four from North America, three from Australia and one study each from Africa and Central America. Seed from 249 species from 43 families have been identified germinating from horse dung. Almost two-thirds of the species were forbs and 33% graminoids, with o…	Paper about number of INNS on a vector (e.g. footwear/clothing/boat) but unclear whether they have successfully been introduced.
531	Ansong M., Pickering C.	Are weeds hitchhiking a ride on your car? A systematic review of seed dispersal on cars	Journal of Environmental Management	2013	When traveling in cars, we can unintentionally carry and disperse weed seed; but which species, and where are they a problem? To answer these questions, we systematically searched the scientific literature to identify all original research studies that assess seed transported by cars and listed the species with seed on/in cars. From the 13 studies that fit these criteria, we found 626 species fro…	Study of road/vehicles, railways or boats where it is unclear whether the primary vehicles/vessels are industrial (e.g. cargo ships, goods trains, works vehicles) or strictly tourist related (yachts, recreational boats, tourist cruise ships etc.)
1070	Aronson R.B., Thatje S., Mcclintock J.B., Hughes K.A.	Anthropogenic impacts on marine ecosystems in Antarctica	Annals of the New York Academy of Sciences	2011	Antarctica is the most isolated continent on Earth, but it has not escaped the negative impacts of human activity. The unique marine ecosystems of Antarctica and their endemic faunas are affected on local and regional scales by overharvesting, pollution, and the introduction of alien species. Global climate change is also having deleterious impacts: rising sea temperatures and ocean acidification…	No quantitative data supplied
713	Auffret A.G.	Can seed dispersal by human activity play a useful role for the conservation of European grasslands?	Applied Vegetation Science	2011	Objective: To review the recent research into human-mediated dispersal (HMD) in the European rural landscape, and explore the potential positive aspect of HMD for grassland conservation, in contrast to it's common association with the spread of invasive species. Methods: A literature search was undertaken to identify HMD vectors in the rural landscape for discussion regarding dispersal potential …	Paper about number of INNS on a vector (e.g. footwear/clothing/boat) but unclear whether they have successfully been introduced.
415	Auffret A.G., Cousins S.A.O.	Humans as Long-Distance Dispersers of Rural Plant Communities	PLoS ONE	2013	Humans are known for their capacity to disperse organisms long distances. Long-distance dispersal can be important for species threatened by habitat destruction, but research into human-mediated dispersal is often focused upon few and/or invasive species. Here we use citizen science to identify the capacity for humans to disperse seeds on their clothes and footwear from a known species pool in a …	Paper about number of INNS on a vector (e.g. footwear/clothing/boat) but unclear whether they have successfully been introduced.
1956	Austin C.C., Zug G.R.	Molecular and morphological evolution in the south-central Pacific skink Emoia tongana (Reptilia: Squamata): Uniformity and human-mediated dispersal	Australian Journal of Zoology	1999	Human-mediated and waif dispersal are both responsible for the distribution of lizards on tropical Pacific islands. The component of each of these dispersal modes to the Pacific herpetofauna, however, is unclear. Morphological conservatism of Pacific lizards, the poor paleontological record on tropical Pacific islands, and minimal research effort in the Pacific (compared with other island systems…	Doesn't report species richness or abundance data
346	Bacela-Spychalska K., Grabowski M., Rewicz T., Konopacka A., Wattier R.	The 'killer Shrimp' dikerogammarus villosus (crustacea, amphipoda) invading alpine lakes: Overland transport by recreational boats and scuba-diving gear as potential entry vectors?	Aquatic Conservation: Marine and Freshwater Ecosystems	2013	The alien freshwater amphipod of Ponto-Caspian origin, Dikerogammarus villosus, also known as the killer shrimp, is recognized as being one of the worst invasive alien species in Europe, representing a major conservation problem. Recently, the species has been reported to invade lakes in the Alps in putative association with overland transport linked with recreational activities. This study provi…	Experimental design doesn't allow calculation of effect size
3066	Baker	The Rainbow Skink, Lampropholis delicata, in Hawaii ﻿	University of Hawaii Press	1979	The rainbow skink, Lampropholis delicata, arrived in Hawaii as an accidental import from Australia sometime about 1900, but its true identity went unknown until recently. Previously, L. delicata in Hawaii had been identified as Lipinia noctua, Leiolopisma hawaiiensis, and Lygosoma metallicum (the latter apparently does not occur in Hawaii). Lampropholis delicata establishes high-altitude records …	Unclear whether tourists or locals involved
759	Ballantyne M., Pickering C.	Ecotourism as a threatening process for wild orchids	Journal of Ecotourism	2012	Orchids are a charismatic and highly diverse group of plants, many of which are threatened by human activities. Nature-based tourism is contributing to the decline of some wild orchid populations, although this has rarely been discussed in the tourism literature. We therefore provide a scoping assessment to demonstrate that tourism contributes to the loss of some orchids in the wild by direct col…	Doesn't report species richness or abundance data
3071	Bataille	Evidence for regular ongoing introductions of mosquito disease vectors into the GalÃ¡pagos Islands	Proceedings of the Royal Society B: Biological Sciences	2009	Wildlife on isolated oceanic islands is highly susceptible to the introduction of pathogens. The recent establishment in the Gala´pagos Islands of the mosquito Culex quinquefasciatus, a vector for diseases such as avian malaria and West Nile fever, is considered a serious risk factor for the archipelago’s endemic fauna. Here we present evidence from the monitoring of aeroplanes and genetic analys…	Doesn't report species richness or abundance data
3070	Batianoff et al.	Plant strategies, dispersal and origins of flora at the northern Coral Sea Islands Territory, Australia	Cunninghamia	2009	A checklist of vascular plants of Coringa-Herald National Nature Reserve (CHNNR) (17º 11’S, 149º 00’ E to 16º 23’S, 150º 30’E and Willis Island (16º 24’S, 149º 58’E) at the northern Coral Sea Islands Territory of Australia compiled during 2006/07 surveys, recorded 30 species including 18 species indigenous to the Coral Sea Islands (60%), 10 exotic species (33%) and two that were planted (7%). Pla…	"Human activities" too vague. Unclear whether tourist related or local population.
976	Bella E.M.	Invasion prediction on Alaska trails: Distribution, habitat, and trail use	Invasive Plant Science and Management	2011	Little is known about the relationship between frequency of occurrence and the expected maximum distance a nonnative species might spread along a trail once introduced to an ecological system with high native species integrity. Understanding how colonization and invasive plant habitat degradation occur in largely intact ecosystems is challenging. Determining which nonnative species are most likel…	No control site, or insufficient information provided about the characteristics of the control site to assess its suitability.
80	Bhattarai K.R., Maren I.E., Subedi S.C.	Biodiversity and invasibility: Distribution patterns of invasive plant species in the Himalayas, Nepal	Journal of Mountain Science	2014	Invasive plant species are exerting a serious threat to biological diversity in many regions of the world. To understand plant invasions this study aims to test which of the two plant invasiveness hypotheses; ‘low native diversity’ vs. ‘high native diversity’, is supported by the regional distribution patterns of invasive plant species in the Himalayas, Nepal. This study is based on data retrieve…	Experimental design doesn't allow calculation of effect size
942	Bigsby K.M., Tobin P.C., Sills E.O.	Anthropogenic drivers of gypsy moth spread	Biological Invasions	2011	The gypsy moth, Lymantria dispar (L.), is a polyphagous defoliator introduced to Medford, Massachusetts in 1869. It has spread to over 860,000 km2 in North America, but this still only represents ¼ of its susceptible host range in the United States. To delay defoliation in the remaining susceptible host range, the government maintains a barrier zone and a quarantine, reflecting a presumption that…	"Human activities" too vague. Unclear whether tourist related or local population.
3077	Boltovskoy	Dispersion and Ecological Impact of the Invasive Freshwater Bivalve Limnoperna fortunei in the Río de la Plata Watershed and Beyond	Biological Invasions	2006	Limnoperna fortunei is a freshwater bivalve that invaded South America through Río de la Plata estuary in 1989 and has since become a major macrofouling pest. Along the Paraná-Paraguay waterway, which hosts intense boat traffic, L. fortunei has moved upstream at an average rate of of 250 km per year. In contrast, along the Uruguay river, where boat traffic is restricted to the lowermost 200 km se…	Study of road/vehicles, railways or boats where it is unclear whether the primary vehicles/vessels are industrial (e.g. cargo ships, goods trains, works vehicles) or strictly tourist related (yachts, recreational boats, tourist cruise ships etc.)
1720	Boone M.D., Semlitsch R.D., Mosby C.	Suitability of golf course ponds for amphibian metamorphosis when bullfrogs are removed	Conservation Biology	2008	Managing areas designed for human recreation so that they are compatible with natural amphibian populations can reduce the negative impacts of habitat destruction. We examined the potential for amphibians to complete larval development in golf course ponds in the presence or absence of overwintered bullfrog tadpoles (Rana catesbeiana), which are frequently found in permanent, human-made ponds. We…	Doesn't report species richness or abundance data
1629	Boshoff A.F., Landman M., Kerley G.I.H., Bradfield M.	Visitors' views on alien animal species in national parks: A case study from South Africa	South African Journal of Science	2008	Little information exists globally on the levels of awareness of visitors to national parks about the role of these parks, in part, to protect ecosystems. An exploratory study, involving a questionnaire survey, supported by interviews, examined visitors' views on the hypothetical presence of alien (that is, non-indigenous) animal species in the Addo Elephant National Park (AENP), South Africa. Co…	Social research, no relevant data supplied.
2038	Bossenbroek J.M., Kraft C.E., Nekola J.C.	Prediction of long-distance dispersal using gravity models: Zebra mussel invasion of inland lakes	Ecological Applications	2001	Gravity models are commonly used by geographers to predict migration and interaction between populations and regions. Even though rarely used by ecologists, gravity models allow estimation of long-distance dispersal between discrete points in heterogeneous landscapes. We developed a production-constrained gravity model to forecast zebra mussel (Dreissena polymorpha) dispersal into inland lakes of…	No quantitative data supplied
2988	Bourdages	Plant introduction and extirpation in a small island park: Natural and anthropogenic rates	ECOSCIENCE	2011	We conducted a historical (40 y) floristic assessment of a small (4 km(2)) park in eastern Canada (Bonaventure Island National Park, Quebec) to evaluate whether small protected areas located in rural landscapes suffer declines in vascular plant populations. We hypothesized that the limited park access (an island accessible only by boat) has a greater influence than the size of the park per se on …	Experimental design doesn't allow calculation of effect size
3069	Bracewell et al.	Cleft, Crevice, or the Inner Thigh: 'Another Place' for the Establishment of the Invasive Barnacle Austrominius modestus (Darwin, 1854)	PLoS ONE	2012	The proliferation of anthropogenic infrastructure in the marine environment has aided the establishment and spread of invasive species. These structures can create novel habitats in areas normally characterised as void of suitable settlement sites. The habitat requirements of the invasive acorn barnacle Austrominius modestus (Darwin, 1854) were assessed using a novel sampling site at Crosby Beach…	No control site, or insufficient information provided about the characteristics of the control site to assess its suitability.
2626	Brancelj, Anton; Sisko, Milijan; Kosi, Gorazd	Distribution of algae and crustacea (Copepoda and Cladocera) in mountain lakes in Slovenia with different trophic levels	Distribution of algae and crustacea (Copepoda and Cladocera) in mountain lakes in Slovenia with different trophic levels	1997	Background and purpose: In the Triglav National Park in the Julian Alps in the NW of Slovenia there are 14 lakes at an altitude between 1, 300 and 2,200 m. In the last five years some of these lakes were faced with an increasing number of visitors. To evaluate tourists' influence combined with trans-boundary pollution, an intensive monitoring program started in 1991. The program was designed to p…	Can’t access full text
1195	Brooking T.E., Rudstam L.G., Krueger S.D., Jackson J.R., Welsh A.B., Fetzer W.W.	First occurrence of the mysid Hemimysis anomala in an inland lake in North America, Oneida Lake, NY	Journal of Great Lakes Research	2010	Hemimysis anomala (Crustacea, Mysidae) is a recent invader to North America that until now was reported only from the Laurentian Great Lakes and their immediate embayments, along with the St. Lawrence River. In August 2009, we identified Hemimysis in diets of white perch and yellow perch in Oneida Lake, NY. Night time vertical plankton net tows detected Hemimysis at four sites across the lake. He…	Doesn't report species richness or abundance data
1957	Buchan L.A.J., Padilla D.K.	Estimating the probability of long-distance overland dispersal of invading aquatic species	Ecological Applications	1999	Accurately predicting the pattern and rate of spread of invading species is difficult, particularly for species that disperse long distances. Though relatively rare, and often stochastic, long-distance dispersal events increase the maximum rate and geographic extent of invasion. Human activities are responsible for the spread of many exotic species, particularly aquatic species such as the zebra …	Doesn't report species richness or abundance data
493	Burfeind D.D., Pitt K.A., Connolly R.M., Byers J.E.	Performance of non-native species within marine reserves	Biological Invasions	2013	Conservation of biodiversity is a major aim of marine reserves; however the effects of reserves on non-native species, a major threat to biodiversity globally, is not widely known. Marine reserves could resist non-native species due to enhanced native diversity and biomass that heightens biotic resistance. Or non-native species could be enhanced by reserves by at least three mechanisms, including…	No quantitative data supplied
1036	Burgin S., Hardiman N.	The direct physical, chemical and biotic impacts on Australian coastal waters due to recreational boating	Biodiversity and Conservation	2011	In economically developed countries it is projected that by around 2015 over 50% of a person's lifetime will become available for leisure. Demand for leisure needs, already strong, will continue to increase. One segment of the market, outdoor nature-based recreation (including tourism), is growing strongly worldwide. A substantial proportion of these activities are water-based. The associated dem…	Native species only
244	Cameron E.K., Davies N.C.	Changes in the wild vascular flora of Tiritiri Matangi Island, 1978-2010	New Zealand Journal of Ecology	2013	Tiritiri Matangi Island ('Tiri') in the Hauraki Gulf of the northern North Island of New Zealand was deforested, pastorally farmed, and then farming was abandoned in 1972. This history is typical of many northern New Zealand islands. The island's modern history is less typical; since 1984 it has been the focus of a major restoration project involving thousands of volunteers. No original forest re…	Experimental design doesn't allow calculation of effect size
2370	Cameron, Erin K.; Bayne, Erin M.; Coltman, David W.	Genetic structure of invasive earthworms Dendrobaena octaedra in the boreal forest of Alberta: insights into introduction mechanisms	MOLECULAR ECOLOGY	2008	Population genetic studies can help to determine whether invasive species are established via single vs. multiple introduction events and also to distinguish among various colonization scenarios. We used this approach to investigate the introduction of Dendrobaena octaedra, a non-native earthworm species, to the boreal forest of northern Alberta. The spread of non-native earthworms in forested sy…	Genetic study, no relevant data supplied
2314	CARLTON, JT; HODDER, J	BIOGEOGRAPHY AND DISPERSAL OF COASTAL MARINE ORGANISMS - EXPERIMENTAL STUDIES ON A REPLICA OF A 16TH-CENTURY SAILING VESSEL	MARINE BIOLOGY	1995	Observational and experimental studies were conducted on the dispersal of fouling organisms on a replica of a 16th-century sailing vessel along an 800 km transect from Yaquina Bay, Oregon to San Francisco Bay, California. The vessel sailed between four bays at slow speeds (3.5 to 4 knots), resided in each bay for approximately 30 d, and spent 1 to 3 d in the open ocean travelling between ports. N…	Paper about number of INNS on a vector (e.g. footwear/clothing/boat) but unclear whether they have successfully been introduced.
320	Chapman J.W., Breitenstein R.A., Carlton J.T.	Port-by-port accumulations and dispersal of hull fouling invertebrates between the Mediterranean sea, the Atlantic ocean and the Pacific ocean	Aquatic Invasions	2013	The R/V Oceanus completed a 9,789 km, 28 day passage from Woods Hole, Massachusetts, in the Atlantic Ocean, through the Panama Canal to Yaquina Bay, Oregon, in the Pacific Ocean on 21 February 2012. The Oceanus had previously operated in the Mediterranean Sea and Atlantic Ocean (including the Caribbean Sea). We document the sequential acquisition of the barnacles Balanus trigonus and Amphibalanus…	Study of road/vehicles, railways or boats where it is unclear whether the primary vehicles/vessels are industrial (e.g. cargo ships, goods trains, works vehicles) or strictly tourist related (yachts, recreational boats, tourist cruise ships etc.)
3067	Chapple	Biosecurity interceptions of an invasive lizard: origin of stowaways and human-assisted spread within New Zealand	Evolutionary Applications	2012	Globalization, and the resultant movement of animals beyond their native range, creates challenges for biosecurity agencies. Limited records of unintentional introductions inhibit our understanding of the trade pathways, transport vectors and mechanisms through which hitchhiker organisms are spread as stowaways. Here, we adopt a phylogeographic approach to determine the source and human-mediated …	No quantitative data supplied
3073	Chown et al	Continent-wide risk assessment for the establishment of nonindigenous species in Antarctica	PNAS	2012	Invasive alien species are among the primary causes of biodiversity change globally, with the risks thereof broadly understood for most regions of the world. They are similarly thought to be among the most significant conservation threats to Antarctica, especially as climate change proceeds in the region. However, no comprehensive, continent-wide evaluation of the risks to Antarctica posed by suc…	Paper about number of INNS on a vector (e.g. footwear/clothing/boat) but unclear whether they have successfully been introduced.
2697	Chown S.L., Convey P.	Spatial and temporal variability across life's hierarchies in the terrestrial Antarctic	Philosophical Transactions of the Royal Society B: Biological Sciences	2007	Antarctica and its surrounding islands lie at one extreme of global variation in diversity. Typically, these regions are characterized as being species poor and having simple food webs. Here, we show that terrestrial systems in the region are nonetheless characterized by substantial spatial and temporal variations at virtually all of the levels of the genealogical and ecological hierarchies which…	No quantitative data supplied
1718	Chwedorzewska K.J.	Poa annua L. in Antarctic: Searching for the source of introduction	Polar Biology	2008	The level of polymorphism, genetic variability and relatedness of a population of Poa annua L. from South Shetlands Islands was studied and compared with results obtained for populations from two potential sources of introduction (Argentina-Ushuaia and Poland-Dziekanów Leśny) using the amplified fragment length polymorphism (AFLP) approach. Five primer pairs used for AFLP profiling amplified 226 …	Doesn't report species richness or abundance data
1285	Chwedorzewska K.J., Korczak M.	Human impact upon the environment in the vicinity of Arctowski Station, King George Island, Antarctica	Polish Polar Research	2010	During thirty three expeditions to the Polish Arctowski Antarctic Station significant influences of human activity upon the environment have been recorded. Introductions of alien species, shifts of bird and seal breeding areas and decreases in both bird and seal populations, are the most obvious effects of human pressure. Though numbers of visits by tourists have increased during this period, imp…	No quantitative data supplied
20	Clark J., Wang Y., August P.V.	Assessing current and projected suitable habitats for tree-of-heaven along the appalachian trail	Philosophical Transactions of the Royal Society B: Biological Sciences	2014	The invasion of ecosystems by non-native species is a major driver of biodiversity loss worldwide. A critical component of effective land management to control invasion is the identification and active protection of areas at high risk of future invasion. The Appalachian Trail Decision Support System (A.T.-DSS) was developed to inform regional natural resource management by integrating remote sens…	No specific data on level of tourism/recreation/visitor numbers provided
2710	Clarke Murray C., Gartner H., Gregr E.J., Chan K., Pakhomov E., Therriault T.W.	Spatial distribution of marine invasive species: Environmental, demographic and vector drivers	Diversity and Distributions	2014	Aim: The introduction of potentially invasive species remains a global threat to biodiversity and ecosystem services. The spatial distribution of introduced species can provide insight into present and historical vectors of invasion. Here, we aim to investigate the influence of environmental, demographic and vector variables on the spatial distribution of non-indigenous species (NIS) in coastal m…	No specific data on level of tourism/recreation/visitor numbers provided
2561	Clarke Murray C., Pakhomov E.A., Therriault T.W.	Recreational boating: A large unregulated vector transporting marine invasive species	Diversity and Distributions	2011	Aim Recreational boating is arguably the largest unregulated vector for the introduction and spread of marine invasive species. Hull fouling communities have been recognized to harbour non-indigenous species (NIS), but presence should not be equated with transport. In this study, we characterize the presence of NIS in hull fouling communities, determine if host vessels transport these species and…	Paper about number of INNS on a vector (e.g. footwear/clothing/boat) but unclear whether they have successfully been introduced.
345	Clarke Murray C., Therriault T.W., Pakhomov E.	What lies beneath? An evaluation of rapid assessment tools for management of hull fouling	Environmental Management	2013	Despite an increased understanding of marine invasions, non-indigenous species (NIS) continue to be redistributed at both global and regional scales. Since prevention is an important element of NIS programs, monitoring vectors responsible for NIS introductions and spread, such as hull fouling, has become a priority and methods should be selected carefully to balance accuracy, time, and cost. Two …	Paper about number of INNS on a vector (e.g. footwear/clothing/boat) but unclear whether they have successfully been introduced.
1199	Claudet J., Fraschetti S.	Human-driven impacts on marine habitats: A regional meta-analysis in the Mediterranean Sea	Biological Conservation	2010	Habitat destruction is one of the main threats to environmental integrity. Assessing the consequences of human impacts is crucial both to predict and prevent structural and functional changes of habitats. However, to date almost all studies on marine threats, from regional to global scales, have been entirely qualitative and generally based on little more than expert opinion. We have developed a …	"Human activities" too vague. Unclear whether tourist related or local population.
721	Compton T.J., De Winton M., Leathwick J.R., Wadhwa S.	Predicting spread of invasive macrophytes in New Zealand lakes using indirect measures of human accessibility	Freshwater Biology	2012	1. Models predicting invasive macrophyte spread between lakes provide an important tool for focusing proactive management efforts to lakes deemed susceptible to invasion. However, challenges to forecasting macrophyte spread include wide physiological tolerances of invasive macrophytes and a lack of information on the relative importance of the various human vectors (e.g. boating traffic). In New …	Study of road/vehicles, railways or boats where it is unclear whether the primary vehicles/vessels are industrial (e.g. cargo ships, goods trains, works vehicles) or strictly tourist related (yachts, recreational boats, tourist cruise ships etc.)
886	Convey P.	Antarctic terrestrial biodiversity in a changing world	Polar Biology	2011	Recent analyses of Antarctic terrestrial biodiversity data, in combination with molecular biological studies, have created a new paradigm that long-term persistence and regional isolation are general features of most of the major groups of Antarctic terrestrial biota, overturning the previously widely assumed view of a generally recent colonisation history. This paradigm, as well as incorporating…	No quantitative data supplied
2526	Copp G.H., Templeton M., Gozlan R.E.	Propagule pressure and the invasion risks of non-native freshwater fishes: A case study in England	Journal of Fish Biology	2007	European countries in general, and England in particular, have a long history of introducing non-native fish species, but there exist no detailed studies of the introduction pathways and propagules pressure for any European country. Using the nine regions of England as a preliminary case study, the potential relationship between the occurrence in the wild of non-native freshwater fishes (from a r…	Study of road/vehicles, railways or boats where it is unclear whether the primary vehicles/vessels are industrial (e.g. cargo ships, goods trains, works vehicles) or strictly tourist related (yachts, recreational boats, tourist cruise ships etc.)
339	Cornelisse T.M., Bennett M.K., Letourneau D.K.	The Implications of Habitat Management on the Population Viability of the Endangered Ohlone Tiger Beetle (Cicindela ohlone) Metapopulation	PLoS ONE	2013	Despite their role in providing ecosystem services, insects remain overlooked in conservation planning, and insect management approaches often lack a rigorous scientific basis. The endangered Ohlone tiger beetle (Cicindela ohlone) occurs in a 24-km2 area in Santa Cruz County, California. The once larger metapopulation now consists of subpopulations inhabiting five patches of coastal prairie where…	Native species only
1333	Coutts A.D.M., Piola R.F., Hewitt C.L., Connell S.D., Gardner J.P.A.	Effect of vessel voyage speed on survival of biofouling organisms: Implications for translocation of non-indigenous marine species	Biofouling	2010	This study experimentally determined the effect of different vessel voyage speeds (5, 10 and 18 knots = 2.6, 5.1 and 9.3 ms-1, respectively) and morphological characteristics including growth form (solitary or colonial), profile (erect or encrusting) and structure (soft, hard or flexible) on the survival of a range of common biofouling organisms. A custom built hydrodynamic keel attached to the b…	Paper about number of INNS on a vector (e.g. footwear/clothing/boat) but unclear whether they have successfully been introduced.
1192	Coutts A.D.M., Valentine J.P., Edgar G.J., Davey A., Burgess-Wilson B.	Removing vessels from the water for biofouling treatment has the potential to introduce mobile non-indigenous marine species	Marine Pollution Bulletin	2010	Vessels found contaminated with biofouling non-indigenous marine species are predominantly removed from the water and treated in vessel maintenance facilities (i.e., slipways, travel lifts and dry-docks). Using pre-fouled settlement plates to simulate a vessel's removal from the water for treatment, we demonstrate that a range of mobile organisms (including non-indigenous marine species) may be l…	Paper about number of INNS on a vector (e.g. footwear/clothing/boat) but unclear whether they have successfully been introduced.
2912	da Conceicao Freitas, Gilson Carlos; Brescovit, Antonio Domingos; Vasconcelos, Simao Dias	Spider diversity on the oceanic island of Fernando de Noronha, Brazil, and implications for species conservation	JOURNAL OF INSECT SCIENCE	2013	Fernando de Noronha is an oceanic archipelago in Brazil that has been subjected to major alterations in its natural habitat, as it is exposed to increasing rates of tourism. This research aimed at performing the first survey of spider species on the main island, focusing on the environmental occupation and conservation status of local species. Spiders were sampled through pitfall traps, beating s…	"Human activities" too vague. Unclear whether tourist related or local population.
551	Darling J.A., Herborg L.-M., Davidson I.C.	Intracoastal shipping drives patterns of regional population expansion by an invasive marine invertebrate	Ecology and Evolution	2012	Understanding the factors contributing to expansion of nonnative populations is a critical step toward accurate risk assessment and effective management of biological invasions. Nevertheless, few studies have attempted explicitly to test hypotheses regarding factors driving invasive spread by seeking correlations between patterns of vector movement and patterns of genetic connectivity. Herein, we…	Study of road/vehicles, railways or boats where it is unclear whether the primary vehicles/vessels are industrial (e.g. cargo ships, goods trains, works vehicles) or strictly tourist related (yachts, recreational boats, tourist cruise ships etc.)
2744	Daudin, Jacques; de Silva, Mark	An annotated checklist of the amphibians and terrestrial reptiles of the Grenadines with notes on their local natural history and conservation	Applied Herpetology	2011	The Grenadine islands, located on the Grenada Bank, are known to have seventeen species of amphibians and terrestrial reptiles. Of three species of amphibians, two are recent introductions and the third (Leptodactylus validus) may be a native remnant that survived the deforestation that initially transformed these islands in the 18th and 19th centuries. The indigenous reptiles, many of which rema…	Can’t access full text
649	Daumer C., Greve C., Hutterer R., Misof B., Haase M.	Phylogeography of an invasive land snail: Natural range expansion versus anthropogenic dispersal in Theba pisana pisana	Biological Invasions	2012	The invasive land snail Theba pisana pisana has been widely dispersed through human activities. The Mediterranean and adjacent Atlantic coasts are considered as natural range of this species, which also occurs northwards to the Netherlands, the British Islands and in Ireland. In addition, T. p. pisana has been introduced to some Macaronesian Islands as well as to Argentina, Australia, South Afric…	Doesn't report species richness or abundance data
1114	Davidson I.C., Zabin C.J., Chang A.L., Brown C.W., Sytsma M.D., Ruiz G.M.	Recreational boats as potential vectors of marine organisms at an invasion hotspot	Aquatic Biology	2010	With more than 200 aquatic nonindigenous species (NIS), San Francisco Bay (California, USA) is among the world's most invaded harbors. Hard-substratum benthic (biofouling) organisms, which dominate NIS richness, have arrived primarily as a result of shipping and aquaculture activity over past centuries. To date there has been no assessment of the leisure craft vector in the Bay. We aimed to chara…	Experimental design doesn't allow calculation of effect size
3083	Day, T.J. and Turton, S.M.,	Ecological impacts of recreation in protected areas: a review	In: Bentrupperbäumer, J.M., Reser, J.P. (Eds) Impacts of Visitation and Use: Psychosocial and biophysical windows on visitation and use in the Wet Tropics of Queensland World Heritage Area. Volume 2. Wet Tropics Management Authority and Rainforest Cooperative Research Centre, James Cook University, Cairns, pp. 143-152.	2000	NA	No quantitative data supplied
3068	Deichsel & Gist	On the origin of the common wall lizards Podarcis muralis (Reptilia: Lacertidae) in Cincinnati, Ohio, USA	Herpetological Review	2001	The European common wall lizard (Podarcis muralis) was introduced in Cincinnati, Ohio (USA) circa 1950; a population now exists in southeastern urban Cincinnati covering an area of more than 6 km² with an expanding tendency. Hedeen and Hedeen (1999) report the present status and the role of railroad tracks in the natural expansion of the population. Because of the ease with which P. muralis can b…	No quantitative data supplied
206	Dubois S., Fraser D.	A framework to evaluate wildlife feeding in research, wildlife management, tourism and recreation	Animals	2013	The expansion of P. muralis in the New World is of interest to European herpetologists because it is known to be an aggressive species with the potential to influence the range of native herpetofauna. For instance, Henle (in Gruschwitz and Boehme 1986), reports Podarcis muralis not tolerating Podarcis sicula on walls occupied by P. muralis. Although walls are a preferred habitat of P. sicula, it …	Native species only or doesn't clearly separate out results for native and invasive species
1270	Edgar G.J., Last P.R., Barrett N.S., Gowlett-Holmes K., Driessen M., Mooney P.	Conservation of natural wilderness values in the Port Davey marine and estuarine protected area, South-Western Tasmania	Aquatic Conservation: Marine and Freshwater Ecosystems	2010	1. Port Davey and associated Bathurst Harbour in south-western Tasmania represent one of the world's most anomalous estuarine systems owing to an unusual combination of environmental factors. These include: (i) large uninhabited catchment protected as a National Park; (ii) ria geomorphology but with fjord characteristics that include a shallow entrance and deep 12-km long channel connecting an al…	No quantitative data supplied
949	Engeman R., Jacobson E., Avery M.L., Meshaka Jr. W.E.	The aggressive invasion of exotic reptiles in Florida with a focus on prominent species: A review	Current Zoology	2011	Florida, along with Hawaii, has among the two worst invasive species problems in the USA, and the state is especially susceptible to establishment by alien reptiles. Besides the large numbers of established non-native reptile species in Florida, many of these species present novel difficulties for management, or have other characteristics making effective management extremely challenging. Moreove…	No quantitative data supplied
1041	Farrapeira C.M.R., Tenorio D.D.O., Amaral F.D.D.	Vessel biofouling as an inadvertent vector of benthic invertebrates occurring in Brazil	Marine Pollution Bulletin	2011	This article reviews the literature involving benthic invertebrates that are cited in association with hull fouling, reporting the species that occur on the Brazilian coast and evaluating the importance of this vector for the introduction of nonindigenous and cryptogenic invertebrates in Brazil. It discusses some of the strategies that were used by the species that allowed for their overseas tran…	No control site, or insufficient information provided about the characteristics of the control site to assess its suitability.
2033	Ficetola G.F., Padoa-schioppa E.	Human activities alter biogeographical patterns of reptiles on Mediterranean islands	Global Ecology and Biogeography	2009	Aim: The theory of island biogeography predicts species richness based on geographical factors that influence the extinction-colonization balance, such as area and isolation. However, human influence is the major cause of present biotic changes, and may therefore modify biogeographical patterns by increasing extinctions and colonizations. Our aim was to evaluate the effect of human activities on …	No quantitative data supplied
1779	Filibeck G., Cornelini P., Petrella P.	Floristic analysis of a high-speed railway embankment in a Mediterranean landscape	Acta Botanica Croatica	2012	We analyzed the floristic composition of a 4.5 km-long segment of a high--speed railway in Lazio, central Italy, which travels on an artificial embankment through an intensively-farmed landscape. In total, 287 vascular plant species were recorded. The life-form distribution was found to be similar to that of the regional species pool, with high percentages of therophytes (38%) and phanerophytes (…	No control site, or insufficient information provided about the characteristics of the control site to assess its suitability.
3073	Floerl & Inglis	Potential for the introduction and spread of marine pests by private yachts	Conference paper: Hull fouling as a mechanism for invasive species introductions: proceedings of a workshop on current issues and potential management strategies. Honolulu Hawaii	2003	Recreational boating is a booming indusrtry worldwide, and movements of domestic and international yachts constitute the majority of inshore vessels in many coastal countries. Hull fouling on private ocean-going yachts has been implicated as a vector in the introduction and secondary spread of a number of aquatic nonindigenous species (NIS). Despite this, there are no existing quarantine procedur…	No control site, or insufficient information provided about the characteristics of the control site to assess its suitability.
2725	Floerl O., Inglis G.J.	Starting the invasion pathway: The interaction between source populations and human transport vectors	Biological Invasions	2005		No control site, or insufficient information provided about the characteristics of the control site to assess its suitability.
2099	Floerl O., Inglis G.J.	Boat harbour design can exacerbate hull fouling	Biological Invasions	2003	Hull fouling is a major cost for owners of small vessels and an important pathway for the spread of non-indigenous aquatic species. The extent of fouling depends on a hull's susceptibility to recruitment by aquatic organisms and the local availability of competent planktonic propagules ('propagule pressure'). Management strategies have typically been concerned with increasing resistance of the hu…	Study of road/vehicles, railways or boats where it is unclear whether the primary vehicles/vessels are industrial (e.g. cargo ships, goods trains, works vehicles) or strictly tourist related (yachts, recreational boats, tourist cruise ships etc.)
44	Floerl O., Inglis G.J., Hayden B.J.	A risk-based predictive tool to prevent accidental introductions of nonindigenous marine species	Environmental Management	2005	Preventing the introduction of nonindigenous species (NIS) is the most efficient way to avoid the costs and impacts of biological invasions. The transport of fouling species on ship hulls is an important vector for the introduction of marine NIS. We use quantitative risk screening techniques to develop a predictive tool of the abundance and variety of organisms being transported by ocean-going ya…	No control site, or insufficient information provided about the characteristics of the control site to assess its suitability.
2200	Floerl O., Pool T.K., Inglis G.J.	Positive interactions between nonindigenous species facilitate transport by human vectors	Ecological Applications	2004	Numerous studies have shown how interactions between nonindigenous species (NIS) can accelerate the rate at which they establish and spread in invaded habitats, leading to an "invasional meltdown." We investigated facilitation at an earlier stage in the invasion process: during entrainment of propagules in a transport pathway. The introduced bryozoan Watersipora subtorquata is tolerant of several…	Study of road/vehicles, railways or boats where it is unclear whether the primary vehicles/vessels are industrial (e.g. cargo ships, goods trains, works vehicles) or strictly tourist related (yachts, recreational boats, tourist cruise ships etc.)
459	Floerl O., Rickard G., Inglis G., Roulston H.	Predicted effects of climate change on potential sources of non-indigenous marine species	Diversity and Distributions	2013	Aim: We compare the present-day global ocean climate with future climatologies based on Intergovernmental Panel on Climate Change (IPCC) models and examine whether changes in global ocean climate will affect the environmental similarity of New Zealand's (NZ) coastal environments to those of the rest of the world. Our underlying rationale is that environmental changes to source and recipient regio…	No specific data on level of tourism/recreation/visitor numbers provided
2215	Frenot Y., Chown S.L., Whinam J., Selkirk P.M., Convey P., Skotnicki M., Bergstrom D.M.	Biological invasions in the Antarctic: Extent, impacts and implications	Biological Reviews of the Cambridge Philosophical Society	2005	Alien microbes, fungi, plants and animals occur on most of the sub-Antarctic islands and some parts of the Antarctic continent. These have arrived over approximately the last two centuries, coincident with human activity in the region. Introduction routes have varied, but are largely associated with movement of people and cargo in connection with industrial, national scientific program and touris…	No control site, or insufficient information provided about the characteristics of the control site to assess its suitability.
1367	Freytag A., Vietze C.	"Biodiversity and international tourism: A story of comparative advantage"	Open Political Science Journal	2009	We analyze whether biodiversity is increasing the receipts of tourism and thus is beneficial for developing countries (DCs). The underlying assumption is that a rich biodiversity provides a comparative advantage for most DCs. We use a simple trade theory framework. The model is supported by an empirical analysis. The main findings are that first DCs, being abundant of biodiversity, seem to have a…	Native species only
211	Gantchoff M.G., Belant J.L., Masson D.A.	Occurrence of invasive mammals in southern Nahuel Huapi National Park	Studies on Neotropical Fauna and Environment	2013	Introduced mammals in Patagonia are believed to negatively influence native ecosystems. We surveyed invasive mammals using camera traps in Nahuel Huapi National Park, Argentina, from February to May 2012. We deployed 19 cameras for about 30 days each, for a total of 645 camera days. We obtained 352 independent detections of three invasive mammal species: 67% European hare (Lepus europaeus), 32% w…	Study of road/vehicles, railways or boats where it is unclear whether the primary vehicles/vessels are industrial (e.g. cargo ships, goods trains, works vehicles) or strictly tourist related (yachts, recreational boats, tourist cruise ships etc.)
283	Garbary D.J., Hill N.M., Miller A.G.	Invasion of Rosa rugosa (Rugosa Rose) into coastal Plant communities of Brier Island, Nova Scotia	Canadian Field-Naturalist	2013	During August and September 2010, we surveyed the entire 20.4 km perimeter of Brier Island, Nova Scotia, for the invasive shrub Rosa rugosa (Rugosa Rose). This island in the outer reaches of the Bay of Fundy of Nova Scotia is geographically isolated and relatively undeveloped. Our objective was to determine the extent and mechanism of the invasion of R. rugosa into different coastal habitats to g…	No control site, or insufficient information provided about the characteristics of the control site to assess its suitability.
458	Garcia A., Smith J.R.	Factors influencing human visitation of southern California rocky intertidal ecosystems	Ocean and Coastal Management	2013	In highly urbanized regions, rocky intertidal habitats attract a large number of visitors for recreation, education, and subsistence harvesting. The collecting, trampling, and handling activities of visitors can have detrimental impacts on intertidal flora and fauna, including reduced abundances and biodiversity and alteration of community structure and function. Despite the large human populatio…	Native species only or doesn't clearly separate out results for native and invasive species
2842	Garcia-Gonzalez, Alfredo; Perez Marquez, Rolando	The orchid community in the Biosphere Reserve Sierra del Rosario, Cuba.	Revista de Biología Tropical	2011	The orchid community in the Biosphere Reserve Sierra del Rosario, Cuba. The Biosphere Reserve Sierra del Rosario is located in Western Cuba and two different areas can be characterized: one for tourism and forestry activities, El Taburete (ET), and the other for conservation and research, El Salon (ES). With the aim to know the effect of visitation activities on the orchid community in the Reserv…	Can’t access full text
2070	Garcia-Quijano C., Carlo T., Arce-Nazario J.	Human ecology of a species introduction: Interactions between humans and introduced Green Iguanas in a Puerto Rican Urban Estuary	Human Organization	2011	This paper reports results of interdisciplinary research between anthropologists and wildlife ecologists about the interactions between people and introduced green iguanas (Iguana iguana) in the San Juan Bay Estuary in Puerto Rico. Non-indigenous, introduced species and their impact on invaded ecosystems, including humans, are a worldwide environmental concern. Humans are the dominant species in …	No control site, or insufficient information provided about the characteristics of the control site to assess its suitability.
1392	Gates K.K., Guy C.S., Zale A.V., Horton T.B.	Angler awareness of aquatic nuisance species and potential transport mechanisms	Fisheries Management and Ecology	2009	The role anglers play in transporting aquatic nuisance species (ANS) is important in managing infestations and preventing introductions. The objectives of this study were to: (1) quantify angler movement patterns in southwestern Montana, ANS awareness and equipment cleaning practices; and (2) quantify the amount of soil transported on boots and waders. Mean distance travelled by residents from th…	No control site, or insufficient information provided about the characteristics of the control site to assess its suitability.
1884	George S.L., Crooks K.R.	Recreation and large mammal activity in an urban nature reserve	Biological Conservation	2006	Human recreation has immediate and long-term impacts on wildlife, and exposure to recreational activities might be particularly high in urban systems. We investigated the relationship between human recreation and the spatial and temporal activity patterns of large mammals in an urban nature reserve. Data from remotely triggered infra-red cameras (1999-2001) were used to assess activity for bobcat…	Native species only
885	Gertzen E.L., Leung B.	Predicting the spread of invasive species in an uncertain world: Accommodating multiple vectors and gaps in temporal and spatial data for Bythotrephes longimanus	Biological Invasions	2011	Real-world uncertainties and data limitations make it difficult to predict how, when and where non-indigenous species (NIS) will spread. Typically only a small fraction of sites are sampled during only a few time intervals, such that we know neither the full spatial extent nor the true temporal progress of invasion. Yet, these unsampled locations might affect the invasion dynamics. We extend prop…	Experimental design doesn't allow calculation of effect size
1064	Ghabooli S., Shiganova T.A., Zhan A., Cristescu M.E., Eghtesadi-Araghi P., MacIsaac H.J.	Multiple introductions and invasion pathways for the invasive ctenophore Mnemiopsis leidyi in Eurasia	Biological Invasions	2011	The introduction and spread of non-indigenous species (NIS) in marine ecosystems accelerated during the twentieth century owing to human activities, notably international shipping. Genetic analysis has proven useful in understanding the invasion history and dynamics of colonizing NIS and identifying their source population(s). Here we investigated sequence variation in the nuclear ribosomal Inter…	Study of road/vehicles, railways or boats where it is unclear whether the primary vehicles/vessels are industrial (e.g. cargo ships, goods trains, works vehicles) or strictly tourist related (yachts, recreational boats, tourist cruise ships etc.)
1578	Gibson D.J., Adams E.D., Ely J.S., Gustafson D.J., McEwen D., Evans T.R.	Eighteen years of herbaceous layer recovery of a recreation area in a mesic forest	Journal of the Torrey Botanical Society	2000	Gibson, D. J., E. D. Adams, J. S. Ely, D. J. Gustafson (Department of Plant Biology, Southern Illinois University at Carbondale, Carbondale, IL 62901), D. McEwan (Department of Health Education and Recreation, Southern Illinois University at Carbondale), and T. R. Evans (Illinois Department of Natural Resources, Benton, IL 62812). Eighteen years of herbaceous layer recovery of a recreation area i…	No control site, or insufficient information provided about the characteristics of the control site to assess its suitability.
1616	Gillespie R.G., Claridge E.M., Goodacre S.L.	Review. Biogeography of the fauna of French Polynesia: Diversification within and between a series of hot spot archipelagos	Philosophical Transactions of the Royal Society B: Biological Sciences	2008	The islands of French Polynesia cover an area the size of Europe, though total land area is smaller than Rhode Island. Each hot spot archipelago (Societies, Marquesas, Australs) is chronologically arranged. With the advent of molecular techniques, relatively precise estimations of timing and source of colonization have become feasible. We compile data for the region, first examining colonization …	No control site, or insufficient information provided about the characteristics of the control site to assess its suitability.
1308	Goldstien S.J., Schiel D.R., Gemmell N.J.	Regional connectivity and coastal expansion: Differentiating pre-border and post-border vectors for the invasive tunicate Styela clava	Molecular Ecology	2010	The dramatic increase in marine bio-invasions, particularly of non-indigenous ascidians, has highlighted the vulnerability of marine ecosystems and the productive sectors that rely on them. A critical issue in managing invasive species is determining the relative roles of ongoing introductions, versus the local movement of propagules from established source populations. Styela clava (Herdman, 188…	No control site, or insufficient information provided about the characteristics of the control site to assess its suitability.
2319	Gollasch, S; Lenz, J; Dammer, M; Andres, HG	Survival of tropical ballast water organisms during a cruise from the Indian Ocean to the North Sea	JOURNAL OF PLANKTON RESEARCH	2000	In an assessment of non-indigenous species transported by international ship traffic to German waters, commissioned by the German Federal Environmental Agency, the survival of tropical plankton organisms in ballast water was studied by accompanying a container vessel on its 23-day voyage from Singapore to Bremerhaven in Germany. Two tanks, one filled off Singapore and the other off Colombo, Sri L…	Study of road/vehicles, railways or boats where it is unclear whether the primary vehicles/vessels are industrial (e.g. cargo ships, goods trains, works vehicles) or strictly tourist related (yachts, recreational boats, tourist cruise ships etc.)
71	Gooden B., French K.	Non-interactive effects of plant invasion and landscape modification on native communities	Diversity and Distributions	2014	Aim: Biological invasions and anthropogenic habitat modification are considered to be the leading drivers of global environmental change, yet their synergistic impacts on native communities remain poorly understood. We tested the effects of an invasive grass, Stenotaphrum secundatum, on an endangered coastal swamp forest community across an anthropogenic land use gradient. We also investigated th…	"Human activities" too vague. Unclear whether tourist related or local population.
190	Graeff C.L., Kociolek J.P., Rushforth S.R.	New and interesting diatoms (Bacillariophyta) from Blue Lake Warm Springs, Tooele county, Utah	Phytotaxa	2013	Blue Lake Warm Springs is a system of brackish lakes and marshes in western Utah, USA with a unique diatom flora that has been previously documented. Here we reexamine select taxa in greater detail, erecting two new genera and six new species from this system, and describing two additional species not observed in prior studies of the Blue Lake flora. Naviculonema stagnora gen. nov., sp. nov. and …	Can’t access full text
495	Greenslade P., Burbidge A.A., Lynch A.J.J.	Keeping Australia's islands free of introduced rodents: The Barrow Island example	Pacific Conservation Biology	2013	Islands are important reservoirs of endemic and threatened species, but anthropogenic influences have impacted their biotas. Australia has over 8000 islands, both continental and oceanic, but because of considerably increasedtraffic, both tourist and commercial, many of these islands have been and are subject to increased threats from invasive species. The invasive Black Rat Rattus rattus is of p…	No quantitative data supplied
21	Guo Q., Olden J.D.	Spatial scaling of non-native fish richness across the United States	PLoS ONE	2014	A major goal and challenge of invasion ecology is to describe and interpret spatial and temporal patterns of species invasions. Here, we examined fish invasion patterns at four spatially structured and hierarchically nested scales across the contiguous United States (i.e., from large to small: region, basin, watershed, and sub-watershed). All spatial relationships in both richness and fraction be…	No specific data on level of tourism/recreation/visitor numbers provided
276	Hall C.M.	An Island biogeographical approach to Island tourism and biodiversity: An exploratory study of the caribbean and Pacific Islands	Asia Pacific Journal of Tourism Research	2010	Islands are especially susceptible to the loss of indigenous species following anthropogenic change. Although tourism has long been cited as a justification for conserving biodiversity via the establishment of national parks and reserves, it also contributes to biodiversity loss as a result of direct habitat change and human activities, as well as more indirectly via the introduction of exotic sp…	Native species only
882	Hall C.M.	Biosecurity, tourism and mobility: Institutional arrangements for managing tourism-related biological invasions	Asia Pacific Journal of Tourism Research	2011	Biological invasion, the unintentional introduction of non-native alien plants, animals and disease into a country, has become a major health, economic and environmental issue. Tourism is widely regarded as a major contributor to the dispersal of invasive species. Measures to control biological invasion therefore may have a substantial effect on tourism mobility. The paper therefore examined the …	Native species only
2271	Hansen M.J., Clevenger A.P.	The influence of disturbance and habitat on the presence of non-native plant species along transport corridors	Biological Conservation	2005	The impact from transportation corridors on surrounding habitat often reaches far beyond the edge of the corridor. The altered disturbance regime in plant communities along corridor edges and vehicle traffic facilitate the spread and establishment of invasive non-native plant species. We compared the frequency of non-native plant species along highways and railways and the ability of these specie…	Study of road/vehicles, railways or boats where it is unclear whether the primary vehicles/vessels are industrial (e.g. cargo ships, goods trains, works vehicles) or strictly tourist related (yachts, recreational boats, tourist cruise ships etc.)
1154	Hardiman N., Burgin S.	Recreational impacts on the fauna of Australian coastal marine ecosystems	Journal of Environmental Management	2010	This paper reviews recent research into the ecological impacts of recreation and tourism on coastal marine fauna in Australia. Despite the high and growing importance of water-based recreation to the Australian economy, and the known fragility of many Australian ecosystems, there has been relatively limited research into the effects of marine tourism and recreation, infrastructure and activities,…	No control site, or insufficient information provided about the characteristics of the control site to assess its suitability.
2723	Hass C.G., Knott B.	Sphaeromatid isopods (Crustacea: Isopoda) from the Leschenault estuary, Collie River and Bunbury Harbour	Journal of the Royal Society of Western Australia	2000	Seven species of sphaeromatid isopod were collected from the Leschenault area between 1995 and 1997. The Leschenault Estuary and the Collie River contain clearly estuarine species while Bunbury Harbour is dominated by introduced species. Changes in species diversity between 1995 and 1997 are documented. This is the first record of Paracerceis sculpta (Holmes 1904) for Western Australia. The most …	No control site, or insufficient information provided about the characteristics of the control site to assess its suitability.
3064	Hemp	Introduced plants on Kilimanjaro: tourism and its impact	Plant Ecology	2008	Kilimanjaro, a world heritage site and an icon of global change, not only suffers from climatic alterations but also is undergoing a drastic socio-economic upheaval. A strong increase of tourism enhances the risk of introducing alien plant species in particular in the upper zones of Kilimanjaro. One such species is Poa annua L., a cosmopolitan weed of European origin on roadsides and pastures. Th…	No control site, or insufficient information provided about the characteristics of the control site to assess its suitability.
1585	Hendrix P.F., Callaham Jr. M.A., Drake J.M., Huang C.-Y., James S.W., Snyder B.A., Zhang W.	Pandora's box contained bait: The global problem of introduced earthworms	Annual Review of Ecology, Evolution, and Systematics	2008	Introduced exotic earthworms now occur in every biogeographic region in all but the driest or coldest habitat types on Earth. The global distribution of a few species (e.g., Pontoscolex corethrurus) was noted by early naturalists, but now approximately 120 such peregrine species are recognized to be widespread from regional to global scales, mainly via human activities. Species adapted to human t…	No control site, or insufficient information provided about the characteristics of the control site to assess its suitability.
2303	Hewitt C.L., Campbell M.L., Schaffelke B.	Introductions of seaweeds: Accidental transfer pathways and mechanisms	Botanica Marina	2008	Macroalgae are a significant component of historic and modern invasions, with association to a wide variety of transport mechanisms. These transport mechanisms pose specific constraints on the ways by which species can be taken up, transported and released into a new environment. Currently operating transport mechanisms for marine macroalgae are either associations with intentional introductions …	Can’t access full text
2638	Hickey, Valerie	The Quagga Mussel Crisis at Lake Mead National Recreation Area, Nevada (USA)	CONSERVATION BIOLOGY	2010	Parks are cornerstones of conservation; and non-native invasive species drive extensive changes to biological diversity in parks. Knowing this, national park staff at Lake Mead National Recreation Area in the southwestern United States had a program in place for early detection of the non-native, invasive quagga mussel (Dreissena rostriformis bugensis). Upon finding the mussel in January 2007, ma…	No control site, or insufficient information provided about the characteristics of the control site to assess its suitability.
1754	Hirner J.L.M., Cox S.P.	Effects of rainbow trout (Oncorhynchus mykiss) on amphibians in productive recreational fishing lakes of British Columbia	Canadian Journal of Fisheries and Aquatic Sciences	2007	Stocking lakes with trout to enhance recreational fishing can negatively affect native aquatic species. Our objectives were (i) to compare presence, relative abundance, body size, and developmental stage of amphibians in lakes with and without rainbow trout (Oncorhynchus mykiss) in British Columbia's southern interior, and (ii) to estimate the size of trout impact for application to amphibian con…	Experimental design doesn't allow calculation of effect size
1216	Hochmair H.H., Scheffrahn R.H.	Spatial association of marine dockage with land-borne infestations of invasive termites (Isoptera: Rhinotermitidae: Coptotermes) in Urban South Florida	Journal of Economic Entomology	2010	Marine vessels have been implicated in the anthropogenic dispersal of invasive termites for the past 500 yr. It has long been suspected that two invasive termites, the Formosan subterranean termite, Coptotermes formosanus Shiraki, and Coptotermes gestroi (Wasmann) (Isoptera: Rhinotermitidae), were introduced to and dispersed throughout South Florida by sailboats and yachts. We compared the distan…	Doesn't report species richness or abundance data
2622	Hoddle, MS; Stosic, CD; Mound, LA	Populations of North American bean thrips, Caliothrips fasciatus (Pergande) (Thysanoptera : Thripidae : Panchaetothripinae) not detected in Australia	AUSTRALIAN JOURNAL OF ENTOMOLOGY	2006	Caliothrips fasciatus is native to the USA and western Mexico and overwintering adults are regular contaminants in the 'navel' of navel oranges exported from California, USA to Australia, New Zealand and elsewhere. Due to the long history of regular interceptions of C. fasciatus in Australia, a survey for this thrips was undertaken around airports, seaports, public recreational parks and major ag…	No control site, or insufficient information provided about the characteristics of the control site to assess its suitability.
2745	Hodge, Karim V. D.; Powell, Robert; Censky, Ellen J.	Conserving the herpetofauna of Anguilla	Conservation of Caribbean Island Herpetofaunas Volume 2: Regional Accounts of the West Indies	2011	The herpetofauna of Anguilla, including Sombrero, which sits on its own island bank, includes three amphibians (all introduced), 13 or 14 lizards (two or three introduced, one extirpated, and two or three endemic), three snakes (two introduced), and six turtles (one introduced and one presumably native), including four sea turtles (mariners) known to occur at least occasionally in Anguillian wate…	No specific data on level of tourism/recreation/visitor numbers provided
1938	Hodkinson D.J., Thompson K.	Plant dispersal: The role of man	Journal of Applied Ecology	1997	1. Human activity is an increasingly important mechanism of plant dispersal, particularly in densely populated countries such as England. We investigated which species are commonly dispersed by the following vectors: (i) soil carried on motor vehicles, (ii) topsoil, (iii) sugar factory topsoil, (iv) horticultural stock, and (v) garden throw-outs. 2. We compared the ecological traits of the specie…	No control site, or insufficient information provided about the characteristics of the control site to assess its suitability.
2563	Holdsworth A.R., Frelich L.E., Reich P.B.	Regional extent of an ecosystem engineer: Earthworm invasion in northern hardwood forests	Ecological Applications	2007	The invasion of exotic earthworms into northern temperate and boreal forests previously devoid of earthworms is an important driver of ecosystem change. Earthworm invasion can cause significant changes in soil structure and communities, nutrient cycles, and the diversity and abundance of herbaceous plants. However, the regional extent and patterns of this invasion are poorly known. We conducted a…	No control site, or insufficient information provided about the characteristics of the control site to assess its suitability.
1320	Hughes K.A., Convey P.	The protection of Antarctic terrestrial ecosystems from inter- and intra-continental transfer of non-indigenous species by human activities: A review of current systems and practices	Global Environmental Change	2010	Invasions by non-indigenous species are amongst the greatest threats to global biodiversity, causing substantial disruption to, and sometimes local extinction of, individual species and community assemblages which, in turn, can affect ecosystem structure and function. The terrestrial environment of Antarctica consists of many isolated 'islands' of ice-free ground. Prolonged isolation makes Antarc…	No control site, or insufficient information provided about the characteristics of the control site to assess its suitability.
800	Hughes K.A., Convey P.	Determining the native/non-native status of newly discovered terrestrial and freshwater species in Antarctica - Current knowledge, methodology and management action	Global Environmental Change	2012	Continental Antarctic terrestrial and freshwater environments currently have few established non-native species compared to the sub-Antarctic islands and other terrestrial ecosystems on Earth. This is due to a unique combination of factors including Antarctica's remoteness, harsh climate, physical geography and brief history of human activity. However, recent increases in national operator and to…	No quantitative data supplied
829	Hughes K.A., Fretwell P., Rae J., Holmes K., Fleming A.	Untouched Antarctica: Mapping a finite and diminishing environmental resource	Antarctic Science	2011	Globally, areas categorically known to be free of human visitation are rare, but still exist in Antarctica. Such areas may be among the most pristine locations remaining on Earth and, therefore, be valuable as baselines for future comparisons with localities impacted by human activities, and as sites preserved for scientific research using increasingly sophisticated future technologies. Neverthel…	No control site, or insufficient information provided about the characteristics of the control site to assess its suitability.
1209	Hughes K.A., Lee J.E., Ware C., Kiefer K., Bergstrom D.M.	Impact of anthropogenic transportation to Antarctica on alien seed viability	Polar Biology	2010	Antarctic ecosystems are at risk from the introduction of invasive species. The first step in the process of invasion is the transportation of alien species to Antarctic in a viable state. However, the effect of long-distance human-mediated dispersal, over different timescales, on propagule viability is not well known. We assessed the viability of Poa trivialis seeds transported to Antarctica fro…	No control site, or insufficient information provided about the characteristics of the control site to assess its suitability.
500	Hughes K.A., Worland M.R., Thorne M.A.S., Convey P.	The non-native chironomid Eretmoptera murphyi in Antarctica: Erosion of the barriers to invasion	Biological Invasions	2013	Antarctica is the continent least affected by invasive species, but climate change and increasing human activity are increasing this threat. Antarctic terrestrial ecosystems generally have low biodiversity with simple community structures and little competition for resources. Consequently, species with pre-adaptations or capabilities that allow them to tolerate polar conditions may have dispropor…	No control site, or insufficient information provided about the characteristics of the control site to assess its suitability.
35	Huiskes A.H.L., Gremmen N.J.M., Bergstrom D.M., Frenot Y., Hughes K.A., Imura S., Kiefer K., Lebouvier M., Lee J.E., Tsujimoto M., Ware C., Van de Vijver B., Chown S.L.	Aliens in Antarctica: Assessing transfer of plant propagules by human visitors to reduce invasion risk	Biological Conservation	2014	Despite considerable research on biological invasions, key areas remain poorly explored, especially ways to reduce unintentional propagule transfer. The Antarctic represents a microcosm of the situation, with the numbers of established non-native species growing. Information to help reduce potential impacts is therefore critical. We measured the propagule load of seeds, and fragments of bryophyte…	No control site, or insufficient information provided about the characteristics of the control site to assess its suitability.
3075	Huiskies et al.	Aliens in Antarctica: Assessing transfer of plant propagules by human visitors to reduce invasion risk	Biological Conservation	2014	Despite considerable research on biological invasions, key areas remain poorly explored, especially ways to reduce unintentional propagule transfer. The Antarctic represents a microcosm of the situation, with the numbers of established non-native species growing. Information to help reduce potential impacts is therefore critical. We measured the propagule load of seeds, and fragments of bryophyte…	Paper about number of INNS on a vector (e.g. footwear/clothing/boat) but unclear whether they have successfully been introduced.
2214	Jaeger J.A.G., Bertiller R., Schwick C., Muller K., Steinmeier C., Ewald K.C., Ghazoul J.	Implementing Landscape Fragmentation as an Indicator in the Swiss Monitoring System of Sustainable Development (Monet)	Journal of Environmental Management	2008	There is an increasing need and interest in including indicators of landscape fragmentation in monitoring systems of sustainable landscape management. Landscape fragmentation due to transportation infrastructure and urban development threatens human and environmental well-being by noise and pollution from traffic, reducing the size and viability of wildlife populations, facilitating the spread of…	No control site, or insufficient information provided about the characteristics of the control site to assess its suitability.
773	Jerde C.L., Barnes M.A., DeBuysser E.K., Noveroske A., Lindsay Chadderton W., Lodge D.M.	Eurasian watermilfoil fitness loss and invasion potential following desiccation during simulated overland transport	Aquatic Invasions	2012	Vegetative reproduction promotes human-mediated dispersal of aquatic invasive plants as fragments "hitchhike" between water bodies on boats and trailers. However, desiccation of plant fragments may also reduce fitness, decreasing the likelihood of fragment survival as transport distances increase. Current inter-lake invasive species spread models do not directly consider fitness loss due to desic…	Doesn't report species richness or abundance data
2006	Jesson L., Kelly D., Sparrow A.	The importance of dispersal, disturbance, and competition for exotic plant invasions in Arthur's Pass National Park, New Zealand	New Zealand Journal of Botany	2000	This study investigated the effects of disturbance, dispersal, and plant competition on exotic plant invasion. An assessment of the change in species distributions in the Mingha Valley, Arthur's Pass National Park, over five years showed that many species had increased in range, suggesting that dispersal had limited the distribution of these species. The dispersal barrier was removed experimental…	No control site, or insufficient information provided about the characteristics of the control site to assess its suitability.
2953	Jimenez, Alejandra; Pauchard, Anibal; Marticorena, Alicia; Bustamante, Ramiro O.	Distribution patterns of alien plants in protected natural areas and their adjacent areas of south-central Chile	GAYANA BOTANICA	2013	Natural protected areas (ASP) located in the south-central Chile (Region Metropolitana - Region de la Araucania) are a conservation relict embedded in agricultural and silvicultural matrices. We compared the taxonomic diversity of native and introduced species in nine sites on ASP and their adjacent matrices, in roadsides and interior habitats. We found 353 species native and 120 introduced. The …	Study of road/vehicles, railways or boats where it is unclear whether the primary vehicles/vessels are industrial (e.g. cargo ships, goods trains, works vehicles) or strictly tourist related (yachts, recreational boats, tourist cruise ships etc.)
2037	Johnson L.E., Ricciardi A., Carlton J.T.	Overland dispersal of aquatic invasive species: A risk assessment of transient recreational boating	Ecological Applications	2001	Predictions of the geographic spread of introduced species are often limited by a lack of data on their mechanisms of dispersal. We interviewed boaters and inspected boating equipment at public boat launches on Lake St. Clair (Michigan, USA) to assess the potential for the zebra mussel, an invasive bivalve, to be dispersed overland to inland waters by transient recreational boating activities. Se…	No control site, or insufficient information provided about the characteristics of the control site to assess its suitability.
2047	Jones A.G., Chown S.L., Gaston K.J.	Terrestrial invertebrates of Gough Island: An assemblage under threat?	African Entomology	2002	The natural communities of Gough Island have the reputation of being amongst the most pristine of any cool-temperate oceanic island. However, Gough Island is relatively depauperate in indigenous invertebrates, and preliminary results of an ongoing terrestrial invertebrate survey have shown that introduced species now equal, or exceed, the numbers of indigenous species in many groups. Furthermore,…	No specific data on level of tourism/recreation/visitor numbers provided
1571	Jorgensen R.H., Kollmann J.	Invasion of coastal dunes by the alien shrub Rosa rugosa is associated with roads, tracks and houses	Flora: Morphology, Distribution, Functional Ecology of Plants	2009	Mapping the distribution of invasive alien plant species is significant for testing ecological hypotheses and for guiding effective management. Little is known about the distribution of invasive plants at landscape scale, and the factors controlling their dispersal and establishment are still poorly understood. This is the case for Rosa rugosa, an invasive shrub with negative effects on biodivers…	Doesn't report species richness or abundance data
1187	Kangas K., Luoto M., Ihantola A., Tomppo And E., Siikamaki P.	Recreation-induced changes in boreal bird communities in protected areas	Ecological Applications	2010	The impacts of human-induced disturbance on birds have been studied in growing extent, but there are relatively few studies about the effects of recreation on forest bird communities in protected areas. In this paper, the relative importance of recreation as well as environmental variables on bird communities in Oulanka National Park, in northeastern Finland, was investigated using general additi…	Native species only
1436	Kangas K., Tolvanen A., Kalkaja T., Siikamaki P.	Ecological impacts of revegetation and management practices of ski slopes in northern finland	Environmental Management	2009	Outdoor recreation and nature-based tourism represent an increasingly intensive form of land use that has considerable impacts on native ecosystems. The aim of this paper is to investigate how revegetation and management of ski runs influence soil nutrients, vegetation characteristics, and the possible invasion of nonnative plant species used in revegetation into native ecosystems. A soil and veg…	Study includes evidence of intentional non-native species introduction which may confound results. For example through seeding (ski-resorts) or stocking (angling lakes).
2354	Karatayev V.A., Karatayev A.Y., Burlakova L.E., Padilla D.K.	Lakewide dominance does not predict the potential for spread of dreissenids	Journal of Great Lakes Research	2013	In recent years, quagga mussels (Dreissena rostriformis bugensis) have almost completely replaced zebra mussels (Dreissena polymorpha) in the Lower Great Lakes. As recreational boats are the main vector of spread for dreissenids in North America, this study examined whether lakes Erie and Ontario could still be sources for the spread of zebra mussels. In the summer-fall of 2010, the abundance of …	Can’t access full text
2830	Kelehear, Crystal; Cabrera-Guzman, Elisa; Shine, Richard	Inadvertent consequences of community-based efforts to control invasive species	CONSERVATION LETTERS	2012	Attempts to manipulate species abundances can have unforeseen consequences. Our studies suggest that community-group efforts to cull cane toads (Rhinella marina) invading Australia may interfere with the toad's local enemies. Abundance of the toad parasite Rhabdias pseudosphaerocephala and the ant Iridomyrmex reburrus (a toad predator) may decrease when community groups spray antiseptic (Dettol) …	Doesn't report species richness or abundance data
494	Kelly N.E., Wantola K., Weisz E., Yan N.D.	Recreational boats as a vector of secondary spread for aquatic invasive species and native crustacean zooplankton	Biological Invasions	2013	Recreational boats in tow between lakes are a known vector of the spread of aquatic invading species (AIS), but we have no test of the hypothesis that recreational boats are also a vector of secondary spread of AIS among freshwater ecosystems via in-water transport i. e., while boating between interconnected waterways. In this study, we surveyed recreational boaters travelling into Lake Simcoe (4…	No control site, or insufficient information provided about the characteristics of the control site to assess its suitability.
894	Kerfoot W.C., Yousef F., Hobmeier M.M., Maki R.P., Jarnagin S.T., Churchill J.H.	Temperature, recreational fishing and diapause egg connections: Dispersal of spiny water fleas (Bythotrephes longimanus)	Biological Invasions	2011	The spiny water flea (Bythotrephes longimanus) is spreading from Great Lakes coastal waters into northern inland lakes within a northern temperature-defined latitudinal band. Colonization of Great Lakes coastal embayments is assisted by winds and seiche surges, yet rapid inland expansion across the northern states comes through an overland process. The lack of invasions at Isle Royale National Pa…	No control site, or insufficient information provided about the characteristics of the control site to assess its suitability.
2793	Kilroy C., Unwin M.	The arrival and spread of the bloom-forming, freshwater diatom, Didymosphenia geminata, in New Zealand	Aquatic Invasions	2011	Blooms of the stalked diatom Didymosphenia geminata (Lyngbye) M. Schmidt, 1899 have been increasingly reported worldwide since the 1990s. In 2004, the appearance of blooms in New Zealand, for the first time, highlighted the invasive nature of this organism. In the absence of previous reliable records for this species, D. geminata was assumed to be non-indigenous and a nationally coordinated biose…	No control site, or insufficient information provided about the characteristics of the control site to assess its suitability.
1039	Knapp C.R., Iverson J.B., Buckner S.D., Cant S.V.	Conservation of amphibians and reptiles in the bahamas	Conservation of Caribbean Island Herpetofaunas	2011	The Bahamas are unique relative to other countries and dependent territories in the West Indies because they comprise 29 islands, hundreds of cays, and thousands of emergent rocks spread over 215,000 km2 of ocean. The native herpetofauna of The Bahamas is derived primarily from Cuba and Hispaniola, and numbers 46 species comprised of three frogs (including one endemic), 25 lizards (13 endemic), 1…	Native species only
1038	Knapp I.S., Godwin L.S., Smith J.E., Williams C.J., Bell J.J.	Records of non-indigenous marine species at Palmyra Atoll in the US Line Islands	Marine Biodiversity Records	2011	Globally, introductions of non-indigenous species have caused dramatic economic and ecological damage. Most research on marine invasions has occurred in locations easily accessible by researchers, but much less is known about introductions to remote islands. In the central Pacific, Palmyra Atoll represents one of the last remaining quasi-pristine reef systems left in the world. In the 1940s the A…	No control site, or insufficient information provided about the characteristics of the control site to assess its suitability.
5	Koch F.H., Yemshanov D., Haack R.A., Magarey R.D.	Using a network model to assess risk of forest pest spread via recreational travel	PLoS ONE	2014	Long-distance dispersal pathways, which frequently relate to human activities, facilitate the spread of alien species. One pathway of concern in North America is the possible spread of forest pests in firewood carried by visitors to campgrounds or recreational facilities. We present a network model depicting the movement of campers and, by extension, potentially infested firewood. We constructed …	No control site, or insufficient information provided about the characteristics of the control site to assess its suitability.
738	Koch F.H., Yemshanov D., Magarey R.D., Smith W.D.	Dispersal of invasive forest insects via recreational firewood: A quantitative analysis	Journal of Economic Entomology	2012	Recreational travel is a recognized vector for the spread of invasive species in North America. However, there has been little quantitative analysis of the risks posed by such travel and the associated transport of firewood. In this study, we analyzed the risk of forest insect spread with firewood and estimated related dispersal parameters for application in geographically explicit invasion model…	No control site, or insufficient information provided about the characteristics of the control site to assess its suitability.
703	Kolosovich A.S., Chandra S., Saito L., Davis C.J., Atwell L.	Short-term survival and potential grazing effects of the New Zealand mudsnail in an uninvaded Western Great Basin watershed	Aquatic Invasions	2012	We offer a case study showing: a) the susceptibility of the Truckee River and Lake Tahoe to an invasion by the New Zealand mudsnail (Potamopyrgus antipodarum) and b) the short-term impacts on periphyton standing crop in the Truckee River and Lake Tahoe as a result of grazing by New Zealand mudsnails. Snail survivorship in the Truckee River experiment ranged from 50-85 percent across treatments an…	No specific data on level of tourism/recreation/visitor numbers provided
505	Kuznecova V., Skujiene G.	Is chondrula tridens (müller, 1774) an invasive snail species in lithuania?	Ekologija	2013	The aim of the present paper is to answer the question whether the species is invasive or not and describe the studied peculiarities of the Lithuanian population of the species: 1) distribution pattern; 2) relation to vegetation; 3) land snails' community composition in the studied sites. All literature data about the distribution of this species in Lithuania is reviewed. Research was made in 17 …	No control site, or insufficient information provided about the characteristics of the control site to assess its suitability.
2839	Lacoursiere-Roussel, A; McKindsey, Christopher W; Bock, Dan G; Cristescu, Melania E; Guichard, Frederic; Girard, Philippe; Legendre, Pierre	Data from: Disentangling invasion processes in a dynamic shipping - boating network.	Dryad	2012	The relative importance of multiple vectors to the initial establishment, spread, and population dynamics of invasive species remains poorly understood. This study used molecular methods to clarify the roles of commercial shipping and recreational boating in the invasion by the cosmopolitan tunicate, Botryllus schlosseri. We evaluated i) single vs. multiple introduction scenarios, ii) the relativ…	Molecular study, not relevant
2295	Lambert, CC; Lambert, G	Non-indigenous ascidians in southern California harbors and marinas	MARINE BIOLOGY	1998	Southern California's many large harbors form an important coastal ecosystem, yet they are also a major destination for thousands of pleasure craft and cargo vessels that have often traveled great distances. Many groups of marine organisms, including ascidians, have now been documented as undergoing range extensions as a consequence of rapid ship-transport between distant harbors phenomenon. This…	Experimental design doesn't allow calculation of effect size
1725	Lavoie C., Saint-Louis A.	Can a small park preserve its flora? A historical study of Bic National Park, Quebec	Botany	2008	We reconstructed the 100 year history of the botanical composition of a small (19 km2) park (Bic National Park, Bic/St. Fabien, Quebec) located within an agricultural landscape. Using 64 historical sources and a botanical field survey, we documented changes in the native and exotic vascular flora that occurred before and after the creation of the park in 1984. We evaluated how many native species…	Can’t access full text
1236	Le Roux J.J., Wieczorek A.M., Tran C.T., Vorsino A.E.	Disentangling the dynamics of invasive fireweed (Senecio madagascariensis Poir. species complex) in the Hawaiian Islands	Biological Invasions	2010	Studies investigating the genetic variation of invasive species render opportunities to better understand the dynamics of biological invasions from an ecological and evolutionary perspective. In this study, we investigate fine-scale population genetic structure of invasive Senecio madagascariensis (fireweed) using microsatellite markers to determine levels of genetic diversity and how it pertains…	Molecular study, not relevant
2052	le Roux P.C., Ramaswiela T., Kalwij J.M., Shaw J.D., Ryan P.G., Treasure A.M., McClelland G.T.W., McGeoch M.A., Chown S.L.	Human activities, propagule pressure and alien plants in the sub-Antarctic: Tests of generalities and evidence in support of management	Biological Conservation	2013	Despite concerns about the richness of plant invaders on islands, and their likely effects on local systems, impacts of these species seem to be small. However, this may be due to an absence of information on impacts, including changing species occupancy and forecast occupancy, rather than lack of impact per se. Here we use the plant invaders on the sub-Antarctic Prince Edward Islands (PEIs) and …	"Human activities" too vague. Unclear whether tourist related or local population.
953	Lee J.E., Chown S.L.	Quantification of intra-regional propagule movements in the Antarctic	Antarctic Science	2011	Abstract Management of non-native species introductions is a conservation priority in the Antarctic region. However, despite the recognised importance of intra-regional propagule transfer, the majority of studies have focused on inter-regional pathways (i.e. from outside of the Antarctic region). Here we quantify the number of seeds carried by expeditioners who have visited sub-Antarctic Marion I…	Can’t access full text
1189	Leighton P.A., Horrocks J.A., Kramer D.L.	Conservation and the scarecrow effect: Can human activity benefit threatened species by displacing predators?	Biological Conservation	2010	Most wild animals show direct negative responses to human disturbance; however, disturbance may also have positive indirect effects by altering species interactions. In the Caribbean, introduced mongooses (Herpestes javanicus) are an important diurnal predator of the nests of critically endangered hawksbill sea turtles (Eretmochelys imbricata). We asked whether daytime visitor activity could bene…	Doesn't report species richness or abundance data
2374	Lewis P.N., Hewitt C.L., Riddle M., McMinn A.	Marine introductions in the Southern Ocean: An unrecognised hazard to biodiversity	Marine Pollution Bulletin	2003	This study investigated the potential for transport of organisms between Hobart, Macquarie Island and the Antarctic continent by ships used in support of Antarctic science and tourism. Northward transport of plankton in ballast water is more likely than southward transport because ballast is normally loaded in the Antarctic and unloaded at the home port. Culturing of ballast water samples reveale…	Paper about number of INNS on a vector (e.g. footwear/clothing/boat) but unclear whether they have successfully been introduced.
2762	Liebherr, James K.; Takumi, Raina	Introduction and distributional expansion of Trechus obtusus (Coleoptera: Carabidae) in Maui, Hawai'i.	Pacific Science	2002	Trechus obtusus Erichson (tribe Trechini), native to Europe and North Africa and introduced to the Pacific coast of North America, is recorded for the first time from East Maui Island, Hawai'i, based on collections made at Haleakala National Park in September 1998. The species subsequently expanded its distribution to include Polipoli Springs State Recreation Area, East Maui. Range expansion has …	No quantitative data supplied
1642	Lindsay K., Craig J., Low M.	Tourism and conservation: The effects of track proximity on avian reproductive success and nest selection in an open sanctuary	Tourism Management	2008	While tourism may provide economic benefits for conservation projects, this relationship is unsustainable if visitors reduce the viability of local ecosystems through the disturbance of wildlife. Tiritiri Matangi Island, in New Zealand, encourages tourism in order to fund its ongoing species' recovery and habitat restoration programs, yet the impact of this tourism on the local wildlife is curren…	Native species only
580	Litynska-Zajac M., Chwedorzewska K., Olech M., Korczak-Abshire M., Augustyniuk-Kram A.	Diaspores and phyto-remains accidentally transported to the Antarctic Station during three expeditions	Biodiversity and Conservation	2012	The aim of the project was to assess the size and species range of alien plant diaspores and phyto-remains transported into the Polish Antarctic Station during three Antarctic expeditions. Our study clearly demonstrates that many diaspores can be quite easily unintentionally transported in good conditions to the Antarctic. In the analyzed material there were present diaspores of invasive species.…	Paper about number of INNS on a vector (e.g. footwear/clothing/boat) but unclear whether they have successfully been introduced.
94	Liu X., Li X., Liu Z., Tingley R., Kraus F., Guo Z., Li Y.	Congener diversity, topographic heterogeneity and human-assisted dispersal predict spread rates of alien herpetofauna at a global scale	Ecology Letters	2014	Understanding the factors that determine rates of range expansion is not only crucial for developing risk assessment schemes and management strategies for invasive species, but also provides important insight into the ability of species to disperse in response to climate change. However, there is little knowledge on why some invasions spread faster than others at large spatiotemporal scales. Here…	Study of road/vehicles, railways or boats where it is unclear whether the primary vehicles/vessels are industrial (e.g. cargo ships, goods trains, works vehicles) or strictly tourist related (yachts, recreational boats, tourist cruise ships etc.)
2820	Lodola, A.; Nicolini, L.; Savini, D.; Deidun, A.; Occhipinti-Ambrogi, A.	Range expansion and biometric features of Pinctada imbricata radiata (Bivalvia: Pteriidae) around Linosa Island, Central Mediterranean Sea (Italy)	Italian Journal of Zoology	2013	In the summer of 2011, the infralittoral fringe of Linosa Island (Sicilian Channel, Italy) was surveyed through visual census, by both scuba diving and snorkelling, with the aim of collecting updated data on marine alien species distribution and abundance on the island. Surveys revealed the presence of Pinctada imbricata radiata, an invasive alien bivalve of Indo-Pacific origin, first recorded in…	Can’t access full text
1033	Mari L., Bertuzzo E., Casagrandi R., Gatto M., Levin S.A., Rodriguez-Iturbe I., Rinaldo A.	Hydrologic controls and anthropogenic drivers of the zebra mussel invasion of the Mississippi-Missouri river system	Water Resources Research	2011	We propose a novel ecohydrological model for the invasion of inland waters by the zebra mussel Dreissena polymorpha and test it against field data gathered within the Mississippi-Missouri river system in North America. This biological invasion poses major ecological and economic threats, especially due to the huge population densities reached by local zebra mussel colonies and the species' unpara…	No control site, or insufficient information provided about the characteristics of the control site to assess its suitability.
87	Matthews J., Van der Velde G., Bij de Vaate A., Collas F.P.L., Koopman K.R., Leuven R.S.E.W.	Rapid range expansion of the invasive quagga mussel in relation to zebra mussel presence in The Netherlands and Western Europe	Biological Invasions	2014	Since its appearance in 2006 in a freshwater section of the Rhine-Meuse estuary (Hollandsch Diep, The Netherlands), the non-indigenous quagga mussel has displayed a rapid range expansion in Western Europe. However, an overview characterising the spread and impacts of the quagga mussel in this area is currently lacking. A literature study, supplemented with field data, was performed to gather all …	No control site, or insufficient information provided about the characteristics of the control site to assess its suitability.
3088	McDougall & Wright	The impact of trampling on feldmark vegetation in Kosciuszko National Park, New South Wales	Australian Journal of Botany	2004	A popular walking track in Kosciuszko National Park, New South Wales, passes through areas of feldmark vegetation, a windswept community of sparse dwarf shrubs, cushion plants and herbs. The prevailing westerly winds in this area prune the windward edges of the dominant Epacris gunnii shrubs. Layering on the protected side effectively means that the shrubs slowly move across the ridgetops. Twenty…	Can’t access full text
2949	McNeill M., Phillips C., Young S., Shah F., Aalders L., Bell N., Gerard E., Littlejohn R.	Transportation of nonindigenous species via soil on international aircraft passengers' footwear	Biological Invasions	2011	The potential for transported soil to harbour and spread nonindigenous species (NIS) is widely recognised and many National Plant Protection Organisations (NPPOs) restrict or prohibit its movement. However, surprisingly few studies have surveyed soil while it is in transit to provide direct support for its role in accidental introductions of NIS. Moreover, there are few border interception record…	Paper about number of INNS on a vector (e.g. footwear/clothing/boat) but unclear whether they have successfully been introduced.
916	Mead A., Carlton J.T., Griffiths C.L., Rius M.	Introduced and cryptogenic marine and estuarine species of South Africa	Journal of Natural History	2011	The introduction history, systematics, transport vectors and distribution patterns of 85 introduced and 39 cryptogenic marine or estuarine animals and plants of South Africa are presented. This represents an addition of 93 species compared with previous lists. Taxa covered include protists, dinoflagellates, sponges, cnidarians, annelids, crustaceans, pycnogonids, insects, molluscs, brachiopods, b…	Study of road/vehicles, railways or boats where it is unclear whether the primary vehicles/vessels are industrial (e.g. cargo ships, goods trains, works vehicles) or strictly tourist related (yachts, recreational boats, tourist cruise ships etc.)
101	Medvecka J., Jarolimek I., Senko D., Svitok M.	Fifty years of plant invasion dynamics in Slovakia along a 2,500 m altitudinal gradient	Biological Invasions	2014	Knowledge on the main spatiotemporal trends in plant invasions of habitats is essential for a better understanding of the process of these invasions. The aim of this study was to determine the level of plant invasion, represented by relative richness and total cover of archaeophytes and neophytes, in 45 EUNIS habitat types along with spatiotemporal changes in invasion level with increasing altitu…	No specific data on level of tourism/recreation/visitor numbers provided
2542	Minchin D.	Rapid assessment of the bryozoan, Zoobotryon verticillatum (Delle Chiaje, 1822) in marinas, Canary Islands	Marine Pollution Bulletin	2012	A rapid assessment, using the abundance and distribution range method, was used to evaluate the status of a large branching bryozoan, Zoobotryon verticillatum attached to the immersed part of marina pontoons in the Canary Islands. Colonies were also found attached to the hulls of leisure craft berthed alongside pontoons at three marinas in Lanzarote during 2012. Low levels of abundance and distri…	No control site, or insufficient information provided about the characteristics of the control site to assess its suitability.
2116	Minchin D., Maguire C., Rosell R.	The zebra mussel (Dreissena polymorpha Pallas) invades Ireland: Human mediated vectors and the potential for rapid intranational dispersal	Biology and Environment	2003	In this account we demonstrate that different vessel classes and different types of boat movement are important in determining the role of pleasure craft as a vector for transmission of zebra mussels. Vessels with zebra mussels on their hulls have been found in areas where zebra mussels are not known to be established. The main concern is the overland transport of boats to lakes at more elevated …	No control site, or insufficient information provided about the characteristics of the control site to assess its suitability.
695	Moffitt C.M., James C.A.	Dynamics of Potamopyrgus antipodarum infestations and seasonal water temperatures in a heavily used recreational watershed in intermountain North America	Aquatic Invasions	2012	Following the discovery of New Zealand mudsnails, Potamopyrgus antipodarum, in the Silver Creek watershed in Idaho, we investigated the distribution and dynamics of the snail populations over two years in field surveys. Despite extensive fishing and recreational activities in the watershed, the infestations appeared limited in extent. As with other published studies, densities of P. antipodarum w…	No specific data on level of tourism/recreation/visitor numbers provided
2459	Molina-Montenegro M.A., Carrasco-Urra F., Rodrigo C., Convey P., Valladares F., Gianoli E.	Occurrence of the Non-Native Annual Bluegrass on the Antarctic Mainland and Its Negative Effects on Native Plants	Conservation Biology	2012	Few non-native species have colonized Antarctica, although increased human activity and accelerated climate change may increase their number, distributional range, and effects on native species on the continent. We searched 13 sites on the maritime Antarctic islands and 12 sites on the Antarctic Peninsula for annual bluegrass (Poa annua), a non-native flowering plant. We also evaluated the possib…	No specific data on level of tourism/recreation/visitor numbers provided
1632	Montefalcone M., Chiantore M., Lanzone A., Morri C., Albertelli G., Bianchi C.N.	BACI design reveals the decline of the seagrass Posidonia oceanica induced by anchoring	Marine Pollution Bulletin	2008	The key species Posidonia oceanica is the dominant endemic seagrass in the Mediterranean Sea and its meadows are considered as one of the most important and productive ecosystems in coastal waters. Covering the seabed from the surface down to about 40 m, meadows of P. oceanica are often affected by mechanical direct damages caused by boat anchoring and mooring activities. Negative effects of thes…	Native species only
1180	Monty A., Mahy G.	Evolution of dispersal traits along an invasion route in the wind-dispersed Senecio inaequidens (Asteraceae)	Oikos	2010	In introduced organisms, dispersal propensity is expected to increase during range expansion. This prediction is based on the assumption that phenotypic plasticity is low compared to genetic diversity, and an increase in dispersal can be counteracted by the Allee effect. Empirical evidence in support of these hypotheses is however lacking. The present study tested for evidence of differentiation …	Study of road/vehicles, railways or boats where it is unclear whether the primary vehicles/vessels are industrial (e.g. cargo ships, goods trains, works vehicles) or strictly tourist related (yachts, recreational boats, tourist cruise ships etc.)
2547	Moorman, Michelle C.; Anderson, Christopher B.; Gutierrez, Alvaro G.; Charlin, Rina; Rozzi, Ricardo	Watershed conservation and aquatic benthic macroinvertebrate diversity in the Alberto D'Agostini National Park, Tierra del Fuego, Chile	Anales del Instituto de la Patagonia Serie Ciencias Naturales	2006	Southern South America is known globally for its remote and rugged landscapes, which include one of Chile's largest national park: Alberto De Agostini. The singular nature of this area, however, is also found in is flora and fauna. The recent designation of Magellanic Sub-Antarctic Forests as one of the world's last wilderness areas propelled us to question whether there was detailed evidence for…	No control site, or insufficient information provided about the characteristics of the control site to assess its suitability.
2786	Mount A., Pickering C.M.	Testing the capacity of clothing to act as a vector for non-native seed in protected areas	Journal of Environmental Management	2009	Although humans are a major mechanism for short and long distance seed dispersal, there is limited research testing clothing as a vector. The effect of different types of material (sports vs hiking socks), or different items of clothing (boots, socks, laces vs legs) or the same item (socks) worn in different places on seed composition were assessed in Kosciuszko National Park, Australia. Data was…	No control site, or insufficient information provided about the characteristics of the control site to assess its suitability.
2914	Musil C.F., Milton S.J., Davis G.W.	The threat of alien invasive grasses to lowland Cape floral diversity: An empirical appraisal of the effectiveness of practical control strategies	South African Journal of Science	2005	EUROPEAN ANNUAL GRASSES IN HIGHLY fragmented natural ecosystems along the South African west coast are displacing wildflowers, which form the basis of a growing lucrative, nature-based tourist industry. We examined the cost-effectiveness of different labour-intensive strategies linked to a national poverty relief programme for controlling invasive annual grasses in renosterveld. The treatments te…	Compares control strategies rather than tourist disturbance
807	Nasmith L.E., Tonn W.M., Paszkowski C.A., Scrimgeour G.J.	Limited effects of stocked trout on littoral invertebrates in boreal foothills lakes	Canadian Journal of Fisheries and Aquatic Sciences	2012	Stocking lakes with trout for the purposes of recreational angling is a management strategy that introduces a new predator into these systems and thus deserves careful scrutiny. To assess the impact of non-native trout on littoral invertebrates in naturally fish-bearing lakes in the boreal foothills of Alberta, Canada, we compared their community composition, abundance, and size structure in stoc…	Can’t access full text
660	Needles L.A., Wendt D.E.	Big changes to a small bay: Introduced species and long-term compositional shifts to the fouling community of Morro Bay (CA)	Biological Invasions	2013	Invasive species are cited as being a threat to communities and ecosystems worldwide, yet few studies have demonstrated invader impacts at these scales. Lack of historic data makes capturing large-scale community shifts problematic. We assessed long-term changes in invertebrate composition to the fouling community of a small estuary with relatively little boat traffic and no ballast water input (…	Study of road/vehicles, railways or boats where it is unclear whether the primary vehicles/vessels are industrial (e.g. cargo ships, goods trains, works vehicles) or strictly tourist related (yachts, recreational boats, tourist cruise ships etc.)
950	Nepal S.K., Way P.	Comparison of vegetation conditions along two backcountry trails in Mount Robson Provincial Park, British Columbia (Canada)	Journal of Environmental Management	2007	Vegetation conditions, i.e., plant cover, species richness, and the presence of exotic species, are compared along a high-use trail (Berg Lake Trail-BLT) and a low use trail (Mt. Fitzwilliam Trail-FWT) in Canada's Mt. Robson Provincial Park. We established 71 paired quadrats (1 m×1 m), and assessed the amount of vegetation cover and species richness by four main lifeforms, i.e., woody species, he…	Native species only
2428	Neves, Carolina Somaio; Rocha, Rosana Moreira; Pitombo, Fabio Bettini; Roper, James J.	Use of artificial substrata by introduced and cryptogenic marine species in Paranagua Bay, southern Brazil	BIOFOULING	2007	Ports are important locations for the introduction of marine species, while marinas and pontoons often serve as secondary habitats for these species. In a marina near Paranagua Port, a major international port in southern Brazil, the encrusting community was studied to (i) identify possibly introduced species, and (ii) examine the use of artificial substrata by these species. Samples ( 20620 cm) …	No control site, or insufficient information provided about the characteristics of the control site to assess its suitability.
1277	Niggemann, Marc; Jetzkowitz, Jens; Brunzel, Stefan; Wichmann, Matthias C.; Bialozyt, Ronald	Distribution patterns of plants explained by human movement behaviour	ECOLOGICAL MODELLING	2009	Distribution patterns of plants are affected by human activities such as creation, destruction or modification of habitats. However, another important question is to what extent humans shape plant distributions by acting as dispersal vectors. In order to answer this question we developed a simulation model for the spread of plant species between human settlements. This was done on the basis of ex…	Study of road/vehicles, railways or boats where it is unclear whether the primary vehicles/vessels are industrial (e.g. cargo ships, goods trains, works vehicles) or strictly tourist related (yachts, recreational boats, tourist cruise ships etc.)
2878	Obua J.	The potential, development and ecological impact of ecotourism in Kibale National Park, Uganda	Journal of Environmental Management	1997	Protected areas have great potential for recreation and ecotourism. It is surprising that relatively little work has been done on the evaluation of ecotourism potential of such areas. In many cases, recreation and ecotourism have been introduced into protected areas without prior evaluation which should have helped to reveal the ecological value and fragility of the area in the first place. It is…	Native species only
967	Onton K., Page C.A., Wilson S.K., Neale S., Armstrong S.	Distribution and drivers of coral disease at Ningaloo reef, Indian Ocean	Marine Ecology Progress Series	2011	We investigated the prevalence and potential drivers of coral disease across Ningaloo Reef on the Western Australian coast. Coral disease assessment surveys were undertaken at 2 spatial scales, the first over a small area of reef (Bill's Bay, 2.5 × 5.0 km), where human use is high and where several anoxic events have caused significant coral mortality, and the second over a broader area (spanning…	Native species only or doesn't clearly separate out results for native and invasive species
3002	Palacio-Nunez et al	Freshwater fish's spatial patterns in isolated water springs in North-eastern Mexico	REVISTA DE BIOLOGIA TROPICAL	2010	The Media Luna lake-spring was selected as representative of all thermal or no thermal springs in the zone of Valley of Rioverde, a semi-arid vegetation in the North-eastern of Mexico. This system is inhabited by II fish species, of which six are native. Four of the native species are endemic to the region and threatened due to touristic pressure and to the introduction of exotic species. The obj…	Native species only
277	Parravicini V., Micheli F., Montefalcone M., Morri C., Villa E., Castellano M., Povero P., Bianchi C.N.	Conserving Biodiversity in a Human-Dominated World: Degradation of Marine Sessile Communities within a Protected Area with Conflicting Human Uses	PLoS ONE	2013	Conservation research aims at understanding whether present protection schemes are adequate for the maintenance of ecosystems structure and function across time. We evaluated long-term variation in rocky reef communities by comparing sites surveyed in 1993 and again in 2008. This research took place in Tigullio Gulf, an emblematic case study where various conservation measures, including a marine…	Doesn't report species richness or abundance data
588	Patel A., Rapport D.J.	Assessing the impacts of deer browsing, prescribed burns, visitor use, and trails on an oak-pine forest: Pinery Provincial Park, Ontario, Canada	Natural Areas Journal	2000	An effective approach to increase forest health is to identify and validate a suite of indicators for monitoring forest conditions. We sought indicators of impacts due to deer browsing, prescribed burn, visitor use, and trails on understory plants beside trails in an oak-pine savanna in Pinery Provincial Park, Ontario, Canada. Six commonly used ecological indicators were studied in 216 1-m x 1-m …	Can’t access full text
2442	Paulay, Gustav; Kirkendale, Lisa; Lambert, Gretchen; Meyer, Chris	Anthropogenic biotic interchange in a coral reef ecosystem: A case study from Guam.	Pacific Science	2002	Guam is the administrative and economic hub of Micronesia, hosts one of the largest U.S. military bases in the Pacific, and lies at the crossroads among Pacific islands, the United States, and Asia. Although terrestrial introductions, exemplified by the brown tree snake, have received much attention, marine introductions have been little studied until now. We have documented a diverse assemblage …	No control site, or insufficient information provided about the characteristics of the control site to assess its suitability.
2666	Pearce C.M., Smith D.G.	Saltcedar: Distribution, abundance, and dispersal mechanisms, northern Montana, USA	Wetlands	2003	Introduced saltcedar (Tamarix ramosissima, T. chinensis, and their hybrids) reaches its northward distribution in the Great Plains in Montana, USA. We mapped the locations, patterns of abundance, and ages of saltcedar along the Musselshell River and Fort Peck Reservoir in northeastern Montana to identify concentrations of plants that could be used to infer introduction location, establishment yea…	Can’t access full text
1309	Pearce D.A., Hughes K.A., Lachlan-Cope T., Harangozo S.A., Jones A.E.	Biodiversity of air-borne microorganisms at Halley station, Antarctica	Extremophiles	2010	A study of air-borne microbial biodiversity over an isolated scientific research station on an ice-shelf in continental Antarctica was undertaken to establish the potential source of microbial colonists. The study aimed to assess: (1) whether microorganisms were likely to have a local (research station) or distant (marine or terrestrial) origin, (2) the effect of changes in sea ice extent on micr…	Can’t access full text
67	Pegas F.V., Castley J.G.	Ecotourism as a conservation tool and its adoption by private protected areas in Brazil	Journal of Sustainable Tourism	2014	Ecotourism in private reserves combines the establishment of protected areas with an incentive mechanism to conserve biodiversity. Brazil's private reserve system is well-established but little is known about its links to tourism. This study puts the global private protected area into context and quantifies the extent to which ecotourism has been adopted as a sustainable land-use practice on priv…	Native species only
1373	Penone C., Machon N., Julliard R., Le Viol I.	Do railway edges provide functional connectivity for plant communities in an urban context?	Biological Conservation	2012	Functional connectivity is essential to maintaining biodiversity in fragmented landscapes but little attention has been given to structures that can provide it in an urban context. Using both the taxonomic and functional diversity of semi-natural grassland plant communities, we assessed the functional connectivity of linear transportation infrastructures in urban landscape. We sampled the vegetat…	No control site, or insufficient information provided about the characteristics of the control site to assess its suitability.
435	Pertierra L.R., Lara F., Tejedo P., Quesada A., Benayas J.	Rapid denudation processes in cryptogamic communities from Maritime Antarctica subjected to human trampling	Antarctic Science	2013	This study explores the impact of human trampling on moss and lichen dominated communities of Maritime Antarctica. A simulation of trampling was performed on previously unaffected plots of different terricolous cryptogamic assemblages at Byers Peninsula, Livingston Island. The communities studied were: 1) a uniform moss carpet, 2) a heterogeneous moss assemblage composed of hummocks and turfs, an…	Native species only
2714	Pertierra, Luis R.; Lara, Francisco; Benayas, Javier; Hughes, Kevin A.	Poa pratensis L., current status of the longest-established non-native vascular plant in the Antarctic	POLAR BIOLOGY	2013	A single colony of the non-native grass Poa pratensis L., which was introduced inadvertently to Cierva Point, Antarctic Peninsula, during the 1954-1955 season, was still present during a survey in February 2012, making it the longest surviving non-native vascular plant colony known in Antarctica. Since 1991, the grass cover has roughly tripled in size, with an annual increase in area of approxima…	No specific data on level of tourism/recreation/visitor numbers provided
3085	Phillips, N., Newsome, D.	Understanding the impacts of recreation in Australian protected areas: quantifying damage caused by horse-riding in D’Entrecasteaux National Park, Western Australia	Conservation Biology	2002	There is presently very little published quantitative information on the environmental impacts of recreational horse riding. Particularly in Western Australia the lack of "hard evidence" concerning the environmental impacts of horse riding hinders objective judgement of damage caused by horse riding in national parks. This paper presents data on horse riding impacts in a Western Australian (D'Ent…	Can’t access full text
1554	Piazzi L., Balata D.	Invasion of alien macroalgae in different Mediterranean habitats	Biological Invasions	2009	The study evaluated different macroalgal invasions in the main Mediterranean coastal habitats on hard bottom. Biodiversity, species composition and structure of macroalgal assemblages were compared among non-invaded areas and areas invaded by the Chlorophyta Caulerpa racemosa var. cylindracea and by the turf-forming Rhodophyta Womersleyella setacea in three different habitats: shallow rocky botto…	No specific data on level of tourism/recreation/visitor numbers provided
550	Piazzi L., Gennaro P., Balata D.	Threats to macroalgal coralligenous assemblages in the Mediterranean Sea	Marine Pollution Bulletin	2012	Coralligenous habitat is one of the most important coastal systems of the Mediterranean Sea. This paper evaluates the main threats to macroalgal coralligenous habitats through a review of the relevant literature. Sedimentation, nutrient enrichment and biological invasions can cause severe alterations in the structure of coralligenous assemblages due to the regression of perennial structuring spec…	No quantitative data supplied
3065	Pickering	Literature Review of Horse Riding Impacts on Protected. Areas and a Guide to the Development of an Assessment Program	Environmental Protection Agency	2008	Executive summary: This review has been prepared to guide the development of a program to assess the impacts of horse riding on designated trails traversing some proposed Southeast Queensland National Parks. The review finds: 1. Understanding patterns of visitation is very important when assessing social and environmental impacts of visitor use of protected areas. This includes determining how ma…	No control site, or insufficient information provided about the characteristics of the control site to assess its suitability.
1301	Pickering C., Mount A.	Do tourists disperse weed seed? A global review of unintentional human-mediated terrestrial seed dispersal on clothing, vehicles and horses	Journal of Sustainable Tourism	2010	Human-mediated seed dispersal is recognised as an important, but under-researched, issue. To assess the potential for tourists to act as unintentional seed dispersal agents, we reviewed published and unpublished data on seed dispersal via clothing, vehicles (cars) and in/on horses and donkeys, all of which can be used by tourists. Seeds from 754 species of terrestrial plants have been collected f…	Paper about number of INNS on a vector (e.g. footwear/clothing/boat) but unclear whether they have successfully been introduced.
1777	Pickering C.M., Bear R., Hill W.	Indirect impacts of nature based tourism and recreation: The association between infrastructure and the diversity of exotic plants in Kosciuszko National Park, Australia	Journal of Ecotourism	2007	Tourism and recreation in protected areas results in a range of indirect impacts on the environment, including facilitating the spread of weeds. This research note examines the associations between tourism infrastructure and the diversity and frequency of exotic plants in a large and popular protected area in south-eastern Australia, Kosciuszko National Park. Of the 156 exotic taxa recorded in 18…	Pseudo-rep as includes the results of Hill & Pickering 2006 which were are using
1332	Pickering C.M., Hill W., Newsome D., Leung Y.-F.	Comparing hiking, mountain biking and horse riding impacts on vegetation and soils in Australia and the United States of America	Journal of Environmental Management	2010	Hiking, horse riding and mountain biking are popular in protected areas in Australia and the United States of America. To help inform the often contentious deliberations about use of protected areas for these three types of activities, we review recreation ecology research in both countries. Many impacts on vegetation, soils and trails are similar for the three activities, although there can be d…	Review paper, no primary data provided
952	Pickering C.M., Mount A., Wichmann M.C., Bullock J.M.	Estimating human-mediated dispersal of seeds within an Australian protected area	Biological Invasions	2011	Dispersal is critical step in plant invasions but there is limited information about human-mediated long distance seed dispersal, including in protected areas. Seed dispersal by hikers was quantified for five invasive species (the native Acaena novae-zelandiae, and the non-native weeds Rumex acetosella Anthoxanthum odoratum, Dactylis glomerata and Festuca rubra) in part of Australia's Kosciuszko …	Experimental design doesn't allow calculation of effect size
2107	Pollux B., Minchin D., Van Der Velde G., Van Alen T., Moon-Van Der Staay S.Y., Hackstein J.	Zebra mussels (Dreissena polymorpha) in Ireland, AFLP-fingerprinting and boat traffic both indicate an origin from Britain	Freshwater Biology	2003	1. The zebra mussel (Dreissena polymorpha) is an aquatic nuisance species that invaded Ireland around 1994. We studied the invasion of the zebra mussel combining field surveys and genetic studies, to determine the origin of invasion and the vector of introduction. 2. Field surveys showed that live zebra mussels, attached to the hulls of pleasure boats, were transported from Britain to Ireland. Th…	No control site, or insufficient information provided about the characteristics of the control site to assess its suitability.
2239	Pretto F., Celesti-Grapow L., Carli E., Blasi C.	Influence of past land use and current human disturbance on non-native plant species on small Italian islands	Plant Ecology	2010	Biological invasions are regarded as one of the main drivers of habitat degradation in island ecosystems. Mediterranean islands have been subjected to a high degree of land conversion over the past 60 years, resulting in a massive reduction in the amount of rural land and the sprawl of tourist activities. The aims of this paper are to evaluate the current level of invasion of alien plant species …	Study of road/vehicles, railways or boats where it is unclear whether the primary vehicles/vessels are industrial (e.g. cargo ships, goods trains, works vehicles) or strictly tourist related (yachts, recreational boats, tourist cruise ships etc.)
1074	Pretto F., Celesti-Grapow L., Carli E., Brundu G., Blasi C.	Determinants of non-native plant species richness and composition across small Mediterranean islands	Biological Invasions	2012	The main aim of this paper is to assess the drivers of non-native plant species richness and composition on a set of 37 small Mediterranean islands in Italy. We compiled the list of the non-native flora and distinguished species according to their establishment status. The non-native flora of the islands studied consists of 154 species, 105 of which are established on at least one island. Regress…	"Human activities" too vague. Unclear whether tourist related or local population.
932	Pysek P., Jarosik V., Pergl J.	Alien plants introduced by different pathways differ in invasion success: Unintentional introductions as a threat to natural areas	PLoS ONE	2011	Background: Understanding the dimensions of pathways of introduction of alien plants is important for regulating species invasions, but how particular pathways differ in terms of post-invasion success of species they deliver has never been rigorously tested. We asked whether invasion status, distribution and habitat range of 1,007 alien plant species introduced after 1500 A.D. to the Czech Republ…	No control site, or insufficient information provided about the characteristics of the control site to assess its suitability.
2478	Queiroz R.E., Ventura M.A., Silva L.	Plant diversity in hiking trails crossing Natura 2000 areas in the Azores: Implications for tourism and nature conservation	Biodiversity and Conservation	2014	The Azores Archipelago, located in the North Atlantic Ocean, with an extensive hiking trail system is a promising destination for nature tourism. Hiking is becoming an important touristic attraction, but negative impacts may arise on trails. We aim to evaluate plant biodiversity along eight hiking trails located inside Special Areas of Conservation in two islands with different levels of populati…	No control site, or insufficient information provided about the characteristics of the control site to assess its suitability.
1179	Quinn L.D., Quinn A., Kolipinski M., Davis B., Berto C., Orcholski M., Ghosh S.	Role of horses as potential vectors of non-native plant invasion: An overview	Natural Areas Journal	2010	Non-native plant invasions can lead to staggering ecological and economic costs. Thus, land managers are concerned about vectors of seed and propagule introduction onto public lands. Because horses are one of several potential vectors of non-native seed dispersal, we summarize and interpret existing literature and identify potential impacts of horse use on non-native plant spread in natural areas…	No quantitative data supplied
956	Rabitsch W.	The hitchhiker's guide to alien ant invasions	BioControl	2011	Alien ants are among the most deleterious predatory invertebrates causing havoc to native biodiversity including negative effects on other ant species, other invertebrates and vertebrates, particularly birds and lizards, ecosystem function, economy, animal and human health. The patterns of alien ant invasions and reasons for their success are among the most intensively studied facets of invasion …	No quantitative data supplied
673	Ranjith L., Shukla S.P., Vennila A., Gashaw T.D.	Bioinvasion in antarctic ecosystems	Proceedings of the National Academy of Sciences India Section B - Biological Sciences	2012	Antarctic ecosystems are considered to be pristine ecosystems; however, increasing global temperature and a considerable increase in human activities pertaining to scientific investigations and tourism are major issues that need an immediate address by global scientific communities. This review encompasses around the present and future threats to Antarctic ecosystems due to bioinvasion highlighti…	No quantitative data supplied
1879	Read G.B.	Adventive occurrence in New Zealand of the scale-worm Paralepidonotus ampulliferus (Annelida: Polychaeta: Polynoidae)	New Zealand Journal of Marine and Freshwater Research	2006	The distinctive polynoid Paralepidonotus ampulliferus is known to be distributed across the Indian Ocean and the western Pacific Ocean, and is present around much of the Australian coast. It is reported here for New Zealand for the first time, and a description is provided. The scale-worm has been found subtidally in Whangarei Harbour, and is widespread around the soft-shores of Waitemata Harbour…	Study of road/vehicles, railways or boats where it is unclear whether the primary vehicles/vessels are industrial (e.g. cargo ships, goods trains, works vehicles) or strictly tourist related (yachts, recreational boats, tourist cruise ships etc.)
42	Redmond C.T., Kesheimer A., Potter D.A.	Earthworm community composition, seasonal population structure, and casting activity on Kentucky golf courses	Applied Soil Ecology	2014	Earthworms can be troublesome pests on golf courses when their soil-rich casts become abundant enough to disrupt the maintenance, aesthetics, and playability of putting greens and fairways. Management of the problem is hindered by lack of knowledge of earthworm community structure on North American golf courses. We surveyed communities of endogeic earthworms inhabiting golf course fairways and pu…	No control site, or insufficient information provided about the characteristics of the control site to assess its suitability.
155	Reid B., Torres R.	Didymosphenia geminata invasion in South America: Ecosystem impacts and potential biogeochemical state change in Patagonian rivers	Acta Oecologica	2013	The diatom Didymosphenia geminata has emerged as a major global concern, as both an aggressive invader of rivers and streams in the southern hemisphere, and for its ability to form nuisance blooms in oligotrophic systems in its native range. South American D.geminata blooms were first documented in Chilean Patagonia in May 2010, and have spread to over five regions and three provinces, in Chile a…	No quantitative data supplied
570	Reid B.L., Hernandez K.L., Frangopulos M., Bauer G., Lorca M., Kilroy C., Spaulding S.	The invasion of the freshwater diatom Didymosphenia geminata in Patagonia: Prospects, Strategies, And implications for biosecurity of invasive microorganisms in continental waters	Conservation Letters	2012	The diatom Didymosphenia geminata, which forms nuisance blooms in low nutrient streams worldwide, was documented as an aggressive invader in South America in 2010 from the Futaleufú basin (43.2°S), in Chilean and Argentinean Patagonia. Within 1 year it was confirmed from 20 rivers distributed over 800 km. Driven by perceived economic impacts to tourism and recreation, a strong response ensued, wi…	No quantitative data supplied
802	Rivard D.H., Poitevin J., Plasse D., Carleton M., Currie D.J.	Changing species richness and composition in Canadian national parks	Conservation Biology	2000	Canada's national parks and their surrounding areas differ markedly in size, climate, vegetation, and extent of human development. We tested the extent to which total species richness, native species richness, and the number of extirpations and introductions of terrestrial vertebrates were correlated with each of these factors. To do this, we used surveys of park fauna from the present and from t…	Native species only
351	Rivero N.K., Dafforn K.A., Coleman M.A., Johnston E.L.	Environmental and ecological changes associated with a marina	Biofouling	2013	Anthropogenic modifications to waterways are common and their ecological consequences must be understood to effectively conserve local biodiversity. The facilitation of recreational boating activities often requires substantial alteration of natural areas, however the environmental and ecological consequences of such alterations are rarely described in the scientific literature. In this study, ec…	Native species only or doesn't clearly separate out results for native and invasive species
309	Rizali A., Lohman D.J., Buchori D., Prasetyo L.B., Triwidodo H., Bos M.M., Yamane S., Schulze C.H.	Ant communities on small tropical islands: Effects of island size and isolation are obscured by habitat disturbance and 'tramp' ant species	Journal of Biogeography	2010	Aim Comparisons among islands offer an opportunity to study the effects of biotic and abiotic factors on small, replicated biological communities. Smaller population sizes on islands accelerate some ecological processes, which may decrease the time needed for perturbations to affect community composition. We surveyed ants on 18 small tropical islands to determine the effects of island size, isola…	"Human activities" too vague. Unclear whether tourist related or local population.
905	Rogala J.K., Hebblewhite M., Whittington J., White C.A., Coleshill J., Musiani M.	Human activity differentially redistributes large mammals in the Canadian Rockies national parks	Ecology and Society	2011	National parks are important for conservation of species such as wolves (Canis lupus) and elk (Cervus canadensis). However, topography, vegetation conditions, and anthropogenic infrastructure within parks may limit available habitat. Human activity on trails and roads may lead to indirect habitat loss, further limiting available habitat. Predators and prey may respond differentially to human acti…	Native species only
3076	Rothlisberger	Aquatic Invasive Species Transport via Trailered Boats: What is Being Moved, Who is Moving it, and What Can Be Done	Fisheries	2010	Trailered boats have been implicated in the spread of aquatic invasive species. There has been, however, little empirical research on the type and quantity of aquatic invasive species being transported, nor on the efficacy of management interventions (e.g., inspection crews, boat washing). In a study of small-craft boats and trailers, we collected numerous aquatic and terrestrial organisms, inclu…	No control site, or insufficient information provided about the characteristics of the control site to assess its suitability.
2843	Rovere, Adriana E.; Calabrese, Graciela M.	Moss diversity in degraded environments under restoring in the Lago Puelo National Park (Chubut, Argentina)	Revista Chilena de Historia Natural	2011	Ecological restoration is a discipline that seeks to recover the attributes of an ecosystem which have been lost (species diversity, structure and function). The objective of this work was to evaluate the diversity and different life forms of mosses in three environments with varying levels of degradation, as well as the different substrates they grow on. Our study area lies within Logo Puelo Nat…	No specific data on level of tourism/recreation/visitor numbers provided
455	Ruiz G.M., Fofonoff P.W., Ashton G., Minton M.S., Miller A.W.	Geographic variation in marine invasions among large estuaries: Effects of ships and time	Ecological Applications	2013	Coastal regions exhibit strong geographic patterns of nonnative species richness. Most invasions in marine ecosystems are known from bays and estuaries, where ship-mediated transfers (on hulls or in ballasted materials) have been a dominant vector of species introductions. Conspicuous spatial differences in nonnative species richness exist among bays, but the quantitative relationship between inv…	Study of road/vehicles, railways or boats where it is unclear whether the primary vehicles/vessels are industrial (e.g. cargo ships, goods trains, works vehicles) or strictly tourist related (yachts, recreational boats, tourist cruise ships etc.)
2891	Rutkovska S., Pucka I., Evarts-Bunders P., Paidere J.	The role of railway lines in the distribution of alien plant species in the territory of Daugavpils City (Latvia)	Estonian Journal of Ecology	2013	The study was performed based on an inventory of alien flora in Daugavpils City. During the field studies all the alien species were recorded applying a regular grid consisting of 344 quadrats of 500 m × 500 m. Data of the 84 quadrats that cover all railway lines in the city were analysed to identify relationships between the distribution of alien plants and the location of railway lines. First t…	Study of road/vehicles, railways or boats where it is unclear whether the primary vehicles/vessels are industrial (e.g. cargo ships, goods trains, works vehicles) or strictly tourist related (yachts, recreational boats, tourist cruise ships etc.)
791	Sackett T.E., Smith S.M., Basiliko N.	Exotic earthworm distribution in a mixed-use northern temperate forest region: Influence of disturbance type, development age, and soils	Canadian Journal of Forest Research	2012	The impacts of invasive earthworms in northern North American forests include mixing of soil and litter horizons, changes to nutrient availability, and shifts in understory plant communities. Multi-use forests, with concomitant commercial logging and recreational activities, may have high rates of earthworm dispersal from human activities. Here, we investigated if soil physical and chemical prope…	Experimental design doesn't allow calculation of effect size
73	Sambrook K., Holt R.H.F., Sharp R., Griffith K., Roche R.C., Newstead R.G., Wyn G., Jenkins S.R.	Capacity, capability and cross-border challenges associated with marine eradication programmes in Europe: The attempted eradication of an invasive non-native ascidian, Didemnum vexillum in Wales, United Kingdom	Marine Policy	2014	Increasing recognition of the threat which invasive non-native species present to ecological and economic assets has led to a recent surge in international, regional and national policies. Within the European Union, a draft EU Regulation on the prevention and management of invasive alien species has been developed. The draft Regulation, published in 2013, recommends the creation of a list of inva…	No control site, or insufficient information provided about the characteristics of the control site to assess its suitability.
2530	Scherrer, P; Pickering, CM	Recovery of alpine herbfield on a closed walking track in the Kosciuszko alpine zone, Australia	ARCTIC ANTARCTIC AND ALPINE RESEARCH	2006	Human use of arctic and alpine environments can result in damage to the natural vegetation and soils. Restoration of the damage can have limited success due to the severity of the environment, which restricts plant germination and growth and increases the potential for soil erosion. In this study, we evaluated the success of restoration of a closed track in the alpine area around continental Aust…	Looks at a recovering -- not an active -- trail system
213	Schloder C., Canning-Clode J., Saltonstall K., Strong E.E., Ruiz G.M., Torchin M.E.	The Pacific bivalve Anomia peruviana in the Atlantic: A recent invasion across the Panama Canal?	Aquatic Invasions	2013	The Peruvian jingle shell, Anomia peruviana d'Orbigny, 1846 is native to the Eastern Pacific including Panama. During recent surveys of Panama's marine fauna using settlement plates, we discovered A. peruviana in Limon Bay, near the Atlantic entrance of the Panama Canal. We confirmed our initial morphological identifications using partial sequences of the COI barcode locus. All Anomia individuals…	No control site, or insufficient information provided about the characteristics of the control site to assess its suitability.
77	Schneider, DW; Ellis, CD; Cummings, KS	A transportation model assessment of the risk to native mussel communities from zebra mussel spread	CONSERVATION BIOLOGY	1998	When introduced species threaten native flora and fauna, protection requires an analysis of the risk that native species face from the spread of the introduced species. Models of invading species, however, often do not include a dynamic component of risk. North American freshwater mussels are at risk, of fouling by the introduced zebra mussel (Dreissena polymorpha). Predictions of the risk to nat…	No control site, or insufficient information provided about the characteristics of the control site to assess its suitability.
820	Schramm J.W., Ehrenfeld J.G.	Patterns of patch colonization and expansion in the non-native annual grass Microstegium vimineum (Poaceae)	Rhodora	2012	Identifying the areas most vulnerable to a species' invasion within a habitat or region is crucial to managing and minimizing that species' eventual effect. The exotic annual grass Microstegium vimineum often occurs in the greatest density along disturbed corridors, such as waterways and trails, within otherwise undisturbed forests. We tested the hypothesis that such linear features within forest…	Can’t access full text
920	Sealey K.S., McDonough V.N., Lunz K.S.	Coastal impact ranking of small islands for conservation, restoration and tourism development: A case study of The Bahamas	Ocean and Coastal Management	2014	An 11-year project to characterize, then assess, the health of coastal environments of The Bahamas ranked a total of 238 sites on ten different islands. Satellite images and aerial photography were used to characterize coastal types (e.g. substrate, geomorphology and wave energy to describe beaches, mangroves, or rocky shores), and then field assessments ranked four types of anthropogenic impacts…	Study includes evidence of intentional non-native species introduction which may confound results. For example through seeding (ski-resorts) or stocking (angling lakes).
205	Senator S.A., Rakov N.S., Saxonov S.V., Vasjukov V.M., Ivanova A.V.	New and rare alien plants in the Middle Volga	Russian Journal of Biological Invasions	2013	Reports on the findings of new and rare invasive species in the flora of the Middle Volga Region (Samara and Ulyanovsk oblasts and Tatarstan) are presented. Most of the plants were found on railway embankments and in flower beds and lawns, as well as on the coast of the Kuybyshev and Saratov reservoirs. © 2013 Pleiades Publishing, Ltd.	No control site, or insufficient information provided about the characteristics of the control site to assess its suitability.
873	Shikui D., Jinpeng L., Xiaoyan L., Shiliang L., Qinghe Z.	Impacts of geo-physical factors and human disturbance on composition and diversity of roadside vegetation: A case study from Xishuangbanna National Nature Reserve of Southwest China	African Journal of Biotechnology	2011	We examined vegetation-disturbance-environment relationships in the Xiaomengyang Section of Xishuangbanna Nature Reserve (XNR) using multivariate analysis to understand the impacts of geo-physical factors and human disturbance on vegetation along the highway corridor. We found that native forests were the best habitat for protected/endangered species and native species. The exotic plants Eupatori…	Study of road/vehicles, railways or boats where it is unclear whether the primary vehicles/vessels are industrial (e.g. cargo ships, goods trains, works vehicles) or strictly tourist related (yachts, recreational boats, tourist cruise ships etc.)
498	Simkanin C., Dower J.F., Filip N., Jamieson G., Therriault T.W.	Biotic resistance to the infiltration of natural benthic habitats: Examining the role of predation in the distribution of the invasive ascidian Botrylloides violaceus	Journal of Experimental Marine Biology and Ecology	2013	Anthropogenic marine habitats, such as marinas and breakwaters, are frequently colonized by nonindigenous species (NIS). Comparative studies show that few sessile NIS are found in nearby natural habitats, but little is known about the processes affecting the spread of NIS into these habitats. In southern British Columbia, the invasive colonial ascidian Botrylloides violaceus is widespread, but is…	"Human activities" too vague. Unclear whether tourist related or local population.
1510	Smith T.	Hikers impact on the north fork of the Virgin River, Zion National Park, Utah	American Midland Naturalist	2009	The research studied the benthic algal cyanobacterial community and ecological and physical characteristics to determine whether recreational hiking impacts the Virgin River in Zion National Park, Utah. Sampling occurred on 10 August 2001 of three cobblestones from 11 different riffle locations. The null hypothesis is the algal community will change in assemblage structure and function along a hi…	Native species only
1226	Smith-Castro J.R., Rodewald A.D.	Effects of recreational trails on Northern Cardinals (Cardinalis cardinalis) in forested Urban Parks	Natural Areas Journal	2010	Though typically considered benign, recreational trails have the potential to both alter vegetation and disturb birds in ways that might influence parental nest attendance rates and other behaviors that ultimately can affect reproductive success. We hypothesized that recreational trails negatively impact avian reproductive success either by (1) reducing nest attendance due to direct human disturb…	Native species only or doesn't clearly separate out results for native and invasive species
2503	Stasko A.D., Patenaude T., Strecker A.L., Arnott S.E.	Portage connectivity does not predict establishment success of canoe-mediated dispersal for crustacean zooplankton	Aquatic Ecology	2012	Although community structure may be largely determined by local abiotic and biotic conditions under moderate levels of dispersal, anthropogenic activities can enhance dispersal rates far beyond what would otherwise occur in natural systems. We investigated the potential impact of recreational canoeing on crustacean zooplankton community structure in Killarney Provincial Park, Canada, where canoes…	Paper about number of INNS on a vector (e.g. footwear/clothing/boat) but unclear whether they have successfully been introduced.
448	Steven R., Castley J.G.	Tourism as a threat to critically endangered and endangered birds: Global patterns and trends in conservation hotspots	Biodiversity and Conservation	2013	More than 12 % of bird species are threatened with extinction. Numerous anthropogenic activities and processes are considered responsible for such declines, including tourism related activities. These activities often occur in global biodiversity hotspots but few studies consider the potential risks associated with tourism. The relative importance of tourism as a threat to birds was quantified us…	No control site, or insufficient information provided about the characteristics of the control site to assess its suitability.
398	Stockton K.A., Moffitt C.M.	Disinfection of Three Wading Boot Surfaces Infested with New Zealand Mudsnails	North American Journal of Fisheries Management	2013	New Zealand mudsnails Potamopyrgus antipodarum (NZMS) have been introduced into many continents and are easily transported live while attached to wading and other field gear. We quantified the relative attachment by different life stages of NZMS to felt, neoprene, and rubber-soled boots exposed to two densities of NZMS in experimental exposure totes. Attachment by NZMS occurred on boots of all su…	Not relevant on further reading - experiment looks at how to reduce spread of INNS, rather than their abundance/SR
1639	Stroh E.D., Struckhoff M.A.	Exotic plant species associations with horse trails, old roads, and intact native communities in the Missouri Ozarks	Natural Areas Journal	2009	We compared the extent to which exotic species are associated with horse trails, old roads, and intact communities within three native vegetation types in Ozark National Scenic Riverways, Missouri. We used a general linear model procedure and a Bonferroni multiple comparison test to compare exotic species richness, exotic to native species ratios, and exotic species percent cover across three usa…	Can’t access full text
1358	Sy M., Keenleyside K., Adare K., Reader B., Plante M., Deering P.	Protecting native biodiversity from high-impact invasive species through the protected areas of Parks Canada	Biodiversity	2009	Protected Areas (PAs) that maintain their natural ecological integrity are effective land management tools for resource conservation. In Canada, several factors concur to set the pathway for the introduction and establishment of high-impact Invasive Alien Species (IAS) into PAs, threatening regional biodiversity. In response to this threat, Parks Canada and Canadian Parks Council have developed a…	No quantitative data supplied
2465	Sylvester, Francisco; MacIsaac, Hugh J.	Is vessel hull fouling an invasion threat to the Great Lakes?	DIVERSITY AND DISTRIBUTIONS	2010	Aim Hull fouling is a leading vector for the introduction of marine, non-indigenous species (NIS) worldwide, yet its importance to freshwater habitats is poorly understood. We aimed to establish the complement of NIS transported via this vector to the Great Lakes and to determine if they pose an invasion risk.Location Laurentian Great Lakes.Methods During 2007 and 2008, we collected scrapings fro…	No control site, or insufficient information provided about the characteristics of the control site to assess its suitability.
2695	Titus J.H., Tsuyuzaki S.	Ski slope vegetation of Mount Hood, Oregon, USA	Arctic, Antarctic, and Alpine Research	1999	Ski slope vegetation on Mount Hood, Oregon, U.S.A. was surveyed to assess vegetation that has developed under a constant disturbance regime and the environmental factors that are important in structuring the vegetation. Ski runs extend from 1200 to 2200 m on the south face of Mount Hood. TWINSPAN distinguished 17 plant communities including 4 above treeline and 13 below treeline; 3 of the latter …	Study includes evidence of intentional non-native species introduction which may confound results. For example through seeding (ski-resorts) or stocking (angling lakes).
2799	Titus, JH; Landau, F	Ski slope vegetation of Lee Canyon, Nevada, USA	SOUTHWESTERN NATURALIST	2003	Ski-slope plant communities on Lee Canyon in the Spring Mountains of southern Nevada were surveyed to assess effects of disturbance and environmental factors important in structuring vegetation. Ski runs extended from 2,620 to 2,890 m on the north face of Mount Charleston. Eleven plant communities were identified, including 4 types only on slopes, I type only in adjacent forest, and 6 types that …	Study includes evidence of intentional non-native species introduction which may confound results. For example through seeding (ski-resorts) or stocking (angling lakes).
1171	Tobin P.C., Diss-Torrance A., Blackburn L.M., Brown B.D.	What does "local" firewood buy you? Managing the risk of invasive species introduction	Journal of Economic Entomology	2010	Firewood can serve as a vector in the transport of non-native species, including wood-boring insects that feed within the wood and thus can be transported accidentally. Governments have enacted limitations on the movement of firewood in an effort to limit the anthropogenic movement of non-native species through, for example, recreational camping. Although the movement of invasive species through …	No control site, or insufficient information provided about the characteristics of the control site to assess its suitability.
1169	Tobin P.C., Van Stappen J., Blackburn L.M.	Human visitation rates to the Apostle Islands National Lakeshore and the introduction of the non-native species Lymantria dispar (L.)	Journal of Environmental Management	2010	The introduction of non-native species has accelerated due to increasing levels of global trade and travel, threatening the composition and function of ecosystems. Upon arrival and successful establishment, biological invaders begin to spread and often do so with considerable assistance from humans. Recreational areas can be especially prone to the problem of accidental non-native species transpo…	No control site, or insufficient information provided about the characteristics of the control site to assess its suitability.
1526	Torn A., Tolvanen A., Norokorpi Y., Tervo R., Siikamaki P.	Comparing the impacts of hiking, skiing and horse riding on trail and vegetation in different types of forest	Journal of Environmental Management	2009	Nature-based tourism in protected areas has increased and diversified dramatically during the last decades. Different recreational activities have a range of impacts on natural environments. This paper reports results from a comparison of the impacts of hiking, cross-country skiing and horse riding on trail characteristics and vegetation in northern Finland. Widths and depths of existing trails, …	Native species only
1290	Toy S.J., Newfield M.J.	The accidental introduction of invasive animals as hitchhikers through inanimate pathways: A New Zealand perspective	OIE Revue Scientifique et Technique	2010	Hitchhiker organisms have been known since the earliest days of international travel, but changes in global trade mean that there are more now than ever before. They include a number of serious invasive species and are among the most difficult of quarantine problems to manage. Invasive animals transported as hitchhikers, other than plant pests, fall largely outside the international frameworks fo…	No quantitative data supplied
2509	Trueman, Mandy; Atkinson, Rachel; Guezou, Anne; Wurm, Penny	Residence time and human-mediated propagule pressure at work in the alien flora of Galapagos	BIOLOGICAL INVASIONS	2010	Introduced species present the greatest threat to the unique terrestrial biodiversity of the Galapagos Islands. We assess the current status of plant invasion in Galapagos, predict the likelihood of future naturalizations and invasions from the existing introduced flora, and suggest measures to help limit future invasions. There has been a 1.46 fold increase in plant biodiversity in Galapagos due…	"Human activities" too vague. Unclear whether tourist related or local population.
2978	Tsuyuzaki S.	Vegetation development patterns on skislopes in lowland Hokkaido, northern Japan	Biological Conservation	2002	The Japanese montane zones are usually covered with well-developed forests, and most ski resorts are constructed there. Therefore, the construction of skislopes requires the destruction of forest ecosystems. To detect vegetation development patterns on skislopes, I assessed vegetation on seven skislopes in the lowland of Hokkaido Island, Japan, using 155 2 m×2 m plots. The surrounding vegetation …	Study includes evidence of intentional non-native species introduction which may confound results. For example through seeding (ski-resorts) or stocking (angling lakes).
1247	Ulrich W., Zalewski M., Hajdamowicz I., Stanska M., Ciurzycki W., Tykarski P.	Tourism disassembles patterns of co-occurrence and weakens responses to environmental conditions of spider communities on small lake islands	Community Ecology	2010	The impact of disturbance on animal and plant assemblages has been described mainly in terms of aggregate community properties like species richness, abundance, or productivity. However, the question how disturbance acts on species interactions, particularly on patterns of co-occurrence, has received much less attention. Here we use a large pitfall trap sample of spiders from two complexes of lak…	Native species only
2598	Van Damme, Kay; Banfield, Lisa	Past and present human impacts on the biodiversity of Socotra Island (Yemen): implications for future conservation	ZOOLOGY IN THE MIDDLE EAST	2011	The Socotra Archipelago (Yemen) is globally recognized for its outstanding biodiversity and endemism, designated on this basis a UNESCO World Heritage Site in 2008. The island underwent long geological and political isolation, ensuring preservation of unique ecosystems until the start of the new millennium. Now, Socotra Island is undergoing rapid development, out of balance with conservation. Maj…	No quantitative data supplied
2869	van Gils, H; Mwanangi, M; Rugege, D	Invasion of an alien shrub across four land management regimes, west of St Lucia, South Africa	SOUTH AFRICAN JOURNAL OF SCIENCE	2006	IN THIS ARTICLE WE TEST THE HYPOTHESIS that land management (LM) regimes determine the degree of invasion by an alien shrub. The invasive alien shrub, Chromolaena odorata, shows significant differences in abundance across four contrasting LM regimes west of St Lucia in KwaZulu-Natal, South Africa. Chromolaena ranges from abundant (19.2%) in the State Forest Reserve, to being present (9.4%) in the…	No quantitative data supplied
2625	Van Ommeren, RJ	Species composition on reclaimed ski runs compared with unseeded areas	Journal of Range Management	2001	The cover of native and non-native introduced plants was compared between seeded (reclaimed) ski runs and adjacent or nearby unseeded (control) areas at a managed ski area in northern Arizona to determine the potential effects of revegetation efforts on plant species composition of the area, Although vegetative cover was similar, plant species richness was significantly lower on reclaimed ski run…	Study includes evidence of intentional non-native species introduction which may confound results. For example through seeding (ski-resorts) or stocking (angling lakes).
1006	Vanparys V., Cawoy V., Mahaux O., Jacquemart A.-L.	Comparative study of the reproductive ecology of two co-occurring related plant species: The invasive Senecio inaequidens and the native Jacobaea vulgaris	Plant Ecology and Evolution	2011	Background and aims - A previous study showed that the visitation rate by pollinators and the seed set of the exotic invasive Senecio inaequidens (Asteraceae) were higher compared to the native relative, Jacobaea vulgaris. The first aim of the present study was to assess if these results could be explained by differences in self-fertility, nectar rewards or floral display between the two species.…	Refers to pollinator visitors, not human visitors
69	Vazquez-Luis M., Banach-Esteve G., Alvarez E., Deudero S.	Colonization on Pinna nobilis at a marine protected area: Extent of the spread of two invasive seaweeds	Journal of the Marine Biological Association of the United Kingdom	2014	Introduction of species is a major driver of global change and loss of biodiversity in ecosystems. The Mediterranean Sea is the most heavily invaded region in the world by introduced seaweeds. The fan mussel Pinna nobilis is the largest Mediterranean bivalve, and a protected species, present at depths from 0.5 m to 60 m. In Cabrera National Park marine protected area (MPA) (Balearic Islands, nort…	Diving was the sampling method, not the impact
2578	Vesk, Peter A.; McCarthy, Michael A.; Moir, Melinda L.	How many hosts? Modelling host breadth from field samples	METHODS IN ECOLOGY AND EVOLUTION	2010	1. Host-specificity is important in fundamental and applied studies of biodiversity, but it is difficult to generate definitive data for many species.2. Here, we present a model framework for estimating the realized host breadth of dependent fauna from samples collected from replicate host individuals. We use Bayesian, Zero-inflated Poisson regression to model the abundance conditional upon host …	Looks at "tourist species" (insects) not tourists (people)
974	Vila M., Espinar J.L., Hejda M., Hulme P.E., Jarosik V., Maron J.L., Pergl J., Schaffner U., Sun Y., Pysek P.	Ecological impacts of invasive alien plants: A meta-analysis of their effects on species, communities and ecosystems	Ecology Letters	2011	Biological invasions cause ecological and economic impacts across the globe. However, it is unclear whether there are strong patterns in terms of their major effects, how the vulnerability of different ecosystems varies and which ecosystem services are at greatest risk. We present a global meta-analysis of 199 articles reporting 1041 field studies that in total describe the impacts of 135 alien p…	Study of road/vehicles, railways or boats where it is unclear whether the primary vehicles/vessels are industrial (e.g. cargo ships, goods trains, works vehicles) or strictly tourist related (yachts, recreational boats, tourist cruise ships etc.)
1580	Volta P., Jepsen N.	The recent invasion of Rutilus rutilus (L.) (Pisces: Cyprinidae) in a large South-Alpine lake: Lago Maggiore	Journal of Limnology	2008	Very recently, a common cyprinid fish species at northern latitude, the roach (Rutilus rutilus L.) has been observed in the large south-alpine Lago Maggiore for the first time. The colonization of the lake has the characteristics of an invasion. In order to investigate this new fish population, benthic multi-mesh and commercial gill nets were used to sample fish in a wide gulf in the central part…	No quantitative data supplied
1335	Von Der Lippe M., Kowarik I.	Do cities export biodiversity? Traffic as dispersal vector across urban-rural gradients	Diversity and Distributions	2008	Urban areas are among the land use types with the highes richness in plant species. A main feature of urban floras is the high proportion of non-native species with often divergent distribution patterns along urban-rural gradients. Urban impacts on plant species richness are usually associated with increasing human activity along rural-to-urban gradients. As an important stimulus of urban plant d…	No control site, or insufficient information provided about the characteristics of the control site to assess its suitability.
1242	Wang S., He Y., Song X.	Impacts of climate warming on Alpine glacier tourism and adaptive measures: A case study of Baishui Glacier No. 1 in Yulong Snow Mountain, Southwestern China	Journal of Earth Science	2010	Alpine glaciers usually feature with best hydrothermal condition in mountain climate, and present beautiful glacier scenery, various glacier landforms, rich biodiversity, and easier accessibility, compared with continental glaciers or ice sheets. Nevertheless, Alpine glaciers are more sensitive to climate warming, and climate warming has seriously affected Alpine glaciers and surrounding environm…	Native species only
2628	Ware, Chris; Bergstrom, Dana M.; Muller, Eike; Alsos, Inger Greve	Humans introduce viable seeds to the Arctic on footwear	BIOLOGICAL INVASIONS	2012	Expanding visitation to Polar regions combined with climate warming increases the potential for alien species introduction and establishment. We quantified vascular plant propagule pressure associated with different groups of travelers to the high-Arctic archipelago of Svalbard, and evaluated the potential of introduced seeds to germinate under the most favorable average Svalbard soil temperature…	No control site, or insufficient information provided about the characteristics of the control site to assess its suitability.
2804	Wasilowska, Agnieszka	Spreading of alien plant species along tourist tracks in Karkonosze Mts	Polish Journal of Ecology	1999	Investigations of plants growing along rarely frequented paths in the region of Mumlawski Wierch (1219 m a.s.l.) and a busy tourist track leading onto Szrenica Mt. (1362 m a.s.l.) were performed. An analysis was made of a distance to which the species brought by tourists may invade spruce forest communities. It was found that the number of non-indigenous species (phytocenotically foreign to the n…	Can’t access full text
1225	Waterkeyn A., Vanschoenwinkel B., Elsen S., Anton-Pardo M., Grillas P., Brendonck L.	Unintentional dispersal of aquatic invertebrates via footwear and motor vehicles in a Mediterranean wetland area	Aquatic Conservation: Marine and Freshwater Ecosystems	2010	1. Several human activities, such as actions for nature conservation, research and recreational activities, are closely associated with inland aquatic habitats that are usually considered as isolated island habitats. In this study, the possibility of unintentional dispersal of aquatic invertebrates among water bodies via footwear and motor vehicles was investigated. 2. Mud samples collected from …	No control site, or insufficient information provided about the characteristics of the control site to assess its suitability.
3074	Weaver & Adams	HORSES AS VECTORS IN THE DISPERSAL OF WEEDS INTO NATIVE VEGETATION	Eleventh Australian Weeds Conference Proceedings	1996	The spread of environmental weeds into areas of native vegetation is of increasing concern to managers, and considerable attention has been given to controlling or banning of potential weed dispersal agents such as horses from these areas. This paper reports 29 species of weeds which are dispersed via horse manure, and discusses the relationship between weed dispersal, and weed establishment and …	No control site, or insufficient information provided about the characteristics of the control site to assess its suitability.
259	Weaver D.M., Kwak T.J.	Assessing Effects of Stocked Trout on Nongame Fish Assemblages in Southern Appalachian Mountain Streams	Transactions of the American Fisheries Society	2013	Fisheries managers are faced with the challenge of balancing the management of recreational fisheries with that of conserving native species and preserving ecological integrity. The negative effects that nonnative trout species exert on native trout are well documented and include alteration of competitive interactions, habitat use, and production. However, the effects that nonnative trout may ex…	Study includes evidence of intentional non-native species introduction which may confound results. For example through seeding (ski-resorts) or stocking (angling lakes).
3078	Wells & Laurenroth	The Potential for Horses to Disperse Alien Plants along Recreational Trails	Rangeland Ecology & Management	2007	Plant invasions are rapidly becoming an important threat to the conservation of wildlands. Understanding how potentially invasive plants are dispersed to new habitats is a critical step in the process of understanding such invasions. Our objective was to characterize the potential for long-distance transport of plant species in the digestive tract of horses along recreational trails. We sampled h…	No control site, or insufficient information provided about the characteristics of the control site to assess its suitability.
1771	West E.J., Barnes P.B., Wright J.T., Davis A.R.	Anchors aweigh: Fragment generation of invasive Caulerpa taxifolia by boat anchors and its resistance to desiccation	Aquatic Botany	2007	We use two experiments to assess the role of anthropogenic activities in disseminating the invasive alga, Caulerpa taxifolia. First, we tested the hypothesis that the removal of fragments of C. taxifolia from an estuary would be dependent on anchor type (sand versus rock) and anchor attachment (chain versus rope). Second, we hypothesised that the viability of different sized clumps (1, 5 and 10 g…	No control site, or insufficient information provided about the characteristics of the control site to assess its suitability.
2897	West E.J., Davis A.R., Barnes P.B., Wright J.T.	The role of recreational activities in creating fragments of invasive Caulerpa taxifolia	Journal of Experimental Marine Biology and Ecology	2009	Once non-indigenous species are introduced to a new area, secondary spread is important in determining their ecological and economic impacts. Recreational activities may facilitate the secondary spread of invasive species by creating and transporting viable propagules, however to date there are few manipulative experiments that demonstrate the mechanistic basis of their impact. We examined the ef…	No control site, or insufficient information provided about the characteristics of the control site to assess its suitability.
2325	Whinam, J; Chilcott, N; Bergstrom, DM	Subantarctic hitchhikers: expeditioners as vectors for the introduction of alien organisms	BIOLOGICAL CONSERVATION	2005	Subantarctic islands have depauperate floras and faunas. When combined with recent changes in climate, these factors increase the likelihood of alien species establishing in the subantarctic. Cargo, food and expeditioners in transit to the subantarctic as part of the Australian Antarctic Program (AAP) were inspected to determine their potential as vectors for alien species.All cargo items were fo…	No control site, or insufficient information provided about the characteristics of the control site to assess its suitability.
16	Whitfield A.K., Becker A.	Impacts of recreational motorboats on fishes: A review	Marine Pollution Bulletin	2014	A considerable amount of research has been conducted on the impacts of recreational boating activities on fishes but little or no synthesis of the information has been undertaken. This review shows that motor boats impact on the biology and ecology of fishes but the effects vary according to the species and even particular size classes. Direct hits on fishes by propellers are an obvious impact bu…	No quantitative data supplied
2810	Willette D.A., Ambrose R.F.	The distribution and expansion of the invasive seagrass Halophila stipulacea in Dominica, West Indies, with a preliminary report from St. Lucia	Aquatic Botany	2009	The seagrass Halophila stipulacea Forsskål, native to the Red Sea, is an invasive species in the Mediterranean that was recently observed offshore Grenada, in the Caribbean. Here, we document the presence of this seagrass in Dominica and St. Lucia, demonstrating it has spread across part of the eastern Caribbean. H. stipulacea in Dominica was present in seven locations along the west coast coveri…	No control site, or insufficient information provided about the characteristics of the control site to assess its suitability.
198	Williams S.L., Davidson I.C., Pasari J.R., Ashton G.V., Carlton J.T., Crafton R.E., Fontana R.E., Grosholz E.D., Miller A.W., Ruiz G.M., Zabin C.J.	Managing multiple vectors for marine invasions in an increasingly connected world	BioScience	2013	Invasive species remain a major environmental problem in the world's oceans. Managing the vectors of introduction is the most effective means of mitigating this problem, but current risk assessments and management strategies are largely focused on species, not on vectors and certainly not on multiple simultaneous vectors. To highlight the issue that multiple vectors contribute to invasions, we an…	Study of road/vehicles, railways or boats where it is unclear whether the primary vehicles/vessels are industrial (e.g. cargo ships, goods trains, works vehicles) or strictly tourist related (yachts, recreational boats, tourist cruise ships etc.)
1065	Wimpey J., Marion J.L.	A spatial exploration of informal trail networks within Great Falls Park, VA	Journal of Environmental Management	2011	Informal (visitor-created) trails represent a threat to the natural resources of protected natural areas around the globe. These trails can remove vegetation, displace wildlife, alter hydrology, alter habitat, spread invasive species, and fragment landscapes. This study examines informal and formal trails within Great Falls Park, VA, a sub-unit of the George Washington Memorial Parkway, managed b…	Native species only
2170	Winfield I.J., Durie N.C.	Fish introductions and their management in the English Lake District	Fisheries Management and Ecology	2004	For biogeographical reasons, the English Lake District contains relatively few native fish species although it encompasses 14 major lakes and many smaller water bodies. Nevertheless, it is nationally important for fish biodiversity because of the presence of vendace, Coregonus albula (L.), whitefish, Coregonus lavaretus (L.), and Arctic charr, Salvelinus alpinus (L.), while recreational angling c…	No quantitative data supplied
360	Wodkiewicz M., Galera H., Chwedorzewska K., Gielwanowska I., Olech M.	Diaspores of the introduced species Poa annua L. in soil samples from King George Island (South Shetlands, Antarctica)	Arctic, Antarctic, and Alpine Research	2013	The soil seed bank and seed germination capacity of Poa annua in the vicinity of the Polish Antarctic Station (South Shetlands, Antarctica) were investigated. It was documented that annual bluegrass can reproduce sexually and produce a functional seed bank of close to 5000 seeds/m2 under maritime Antarctic conditions. Comparison of germination between Poa annua and two native plant species reveal…	No specific data on level of tourism/recreation/visitor numbers provided
2755	Yan Xiaoli; Bao Weikai; Zhu Zhu	Effect of Tourism on Epiphytic Bryophyte Community Growing on Abies faxoniana Trees in Primary Forests in Jiuzhaigou, China	Chinese Journal of Applied and Environmental Biology	2009	To determine the long-term effect of tourism on epiphytic bryophytes, species composition, coverage and biomass of the bryophyte community growing on Abies faxoniana trees in primary forests in the Jiuzhaigou, a World Nature Heritage site, in Sichuan, China were investigated. Difference in species composition on tree trunks in the two different areas was tested by comparing dominant value of each…	Native species only
2923	Yocheva, Svetlana V.; Irikov, Atanas A.; Petrova, Slaveya T.; Mollov, Ivelin A.	Assessment of the Threats to the Biodiversity and Habitats in "Stara Reka" Reserve (Bulgaria) and Its Adjacent Subalpine and Alpine Areas	Ecologia Balkanica	2013	The assessment of the threats in the "Stara Reka" reserve and its adjacent subalpine and alpine areas is important since it makes it possible the appropriate conservation measures to be taken in order to prevent or reduce the negative effects on the biodiversity and habitats. The assessment was based on systematic studies and visits in the "Stara Reka" Reserve, located within National Park "Centr…	No quantitative data supplied
